# Supplementary material for: Association between VDR gene FokI polymorphism and renal function in patients with IgA nephropathy
Source: PeerJ. 2019 Jun 10;7:e7092. doi: 10.7717/peerj.7092 (PMC6563792; doi:10.7717/peerj.7092)
Supplement: Supplemental Information 1 [file peerj-07-7092-s001.xlsx]

## Sheet: sheet1
number	gender	age	age>40	height	weight	BMI	SBP	DBP	pulse pressure	eGFR	Hb	PRO	ERY	BUN	Scr	renal dysfunction or not	UA	Ca	P	iPTH	ALB	24hUpro	C	M	E	S	T	25(OH)2D3	25(OH)2D2	Genotypes
1	1	35	0	170	72	24.91	131	71	60	114.53	149	1	1	4.16	72	0	406	2.18	1.27		41	0.51	1	1	1	1	1			3
2	0	32	0	162	64	24.39	115	68	47	90.9	130	1	1	5.55	69	0	305	2.134	1.24		39	0.15	1	1	1	1	1			1
3	1	20	0	164	67	24.91	135	83	52	132.55	156	1	1	3.67	70	0	403	2.429	1.62		46	0.1585	1	1	1	1	1	62.02	6.51	2
4	0	40	0	158	55	22.03	150	79	71	51.25	140	1	1	5.6	109	1	376	2.214	0.98	77.2	40	0.774	1	1	1	2	1			3
5	0	30	0	154	61	25.72	110	70	40	124.87	134	1	1	5.28	53	0	326	2.33	1.37	32.47	43	0.4486	1	1	1	2	1	79.94	7.55	2
6	0	33	0	157	54	21.91	102	64	38	134.08	120	1	1	3.56	49	0	179	2.144	0.88	74.23	40	0.5018	1	2	1	2	1	52.73	5.54	2
7	1	45	1	167	72	25.87	158	90	68	85.15	104	1	1	5.2	99	0	373	2.055	0.78		30.5	1.139	2	1	2	2	2			1
8	1	49	1	180	82	25.31	140	92	48	37.16	163	1	1	7.1	180	1	464	2.344	1.03	38.1	41	1.7505	1	1	1	2	3	58.65	6.16	2
9	1	15	0	168	54	19.13	136	89	47	189.58	139	1	1	3.52	54	0	206	2.193	1.23	43.02	35	1.1024	1	1	1	2	1	13.32	1.4	1
10	1	33	0	165	68	24.98	130	80	50	94.42	146	1	1	4.35	86	0	518	2.157	1.17	29.43	39	3.554	1	1	1	2	1	72.35	7.59	2
11	1	63	1	162	60.5	23.05	144	78	66	29.47	100.9	1	1	12.82	247	1	579	1.733	1.12		16.7	3.0867	1	1	2	1	1	15.88	1.67	1
12	0	19	0	157	47	19.07	111	67	44	91.77	127	1	1	4.37	75	0	295	2.236		11.97	43.1	0.1977	1	1	1	1	1	40.32	4.23	2
13	1	29	0	174	93	30.72	130	72	58	42.98	137	1	1	9.21	174	1	679	2.11	1.62	57.3	34		1	2	1	2	2	40.34	4.24	3
14	1	44	1	155	64	26.64	120	78	42	11	85	1	1	17.12	531	1	565	2.296	1.67	47.88	39.8	1.093	1	2	1	2	1	42.9	4.5	2
15	0	26	0	160	53	20.7	147	92	55	61.08	95	1	1	4.23	101	1	473	2.195	1.48	55.76	34.9	2.0714	1	1	1	2	2	20.24	2.13	2
16	1	57	1	170	63	21.8	149	84	65	105.87	118	1	1	3.52	68	0	417	2.229	1.35		37.6	0.4261	1	2	1	1	1	39.95	4.19	1
17	1	45	1	182	89	26.87	103	72	31	41.51	141	1	1	7.84	166	1	574	2.2	1.56		39.8	2.9384	1	2	1	1	3	14.34	1.51	2
18	1	38	0	177	78	24.9	137	90	47	71.3	152	1	1	5.27	107	1	375	2.189	1.34	69.2	40.1	1.432	1	1	1	2	1	53.79	5.65	3
19	1	30	0	173	80	26.73	138	92	46	53.97	176	1	1	8.42	142	1	559	2.109	1.08	72.56	37.4	5.59	1	1	1	2	1	19.97	2.1	2
20	1	27	0	166	58	21.05	121	67	54	116.97	133	1	1	5	74	0	326	2.274	1.15	33.66	40	1.12	1	2	1	1	1	35.67	3.74	3
21	0	36	0	156	67	27.53	106	68	38	85.87	134	1	1	4.35	71	0	313	2.082	1.02	48.33	36.9	1.28	1	1	1	1	2	23.56	2.47	1
22	1	30	0	165	54.5	20.02	125	72	53	67.1	122	1	1	7.71	135	1	436	2.331	0.9	48.85	37.3	0.4388	1	1	1	2	1	95.21	9.99	1
23	1	31	0	170	62.5	21.63	154	88	66	45.85	100	1	1	8.54	176	1	463	2.003	1.53	62.69	27.1	5.1238	1	1	1	2	2	17.86	1.87	2
24	1	45	1	172	76	25.69	144	80	64	49.7	102	1	1	11.42	142	1	502	2.22	1.14		37	2.415	1	1	1	2	2	43.01	4.51	1
25	0	28	0	161	58	22.38	119	78	41	141.97	130	1	1	4.84	48	0	344	2.22	1.69		36	0.73	1	1	1	2	1	53.38	5.6	2
26	1	51	1	166	62	22.5	123	78	45	136.17	128	1	1	4.82	58	0	279	1.98	0.95		28	5.116	1	1	1	1	1	46.84	4.92	2
27	0	33	0	162	59	22.48	102	53	49	98.52	116	1	1	5.13	64	0	241	2.26			39	0.35	1	2	1	1	1	35.87	3.77	3
28	1	26	0	171	64	21.89	128	93	35	92.84	120	1	1	4.56	91	0	294	2.32	1.03		45	0.79	1	1	1	2	1	50.6	5.31	3
29	0	47	1	161	55	21.22	134	89	45	78.78	142	1	1	4.31	73	0	192	2.25	1.71		43	0.53	1	1	1	2	2	46.12	4.84	2
30	1	37	0	160	74	28.91	156	97	59	36.73	120	1	1	9.14	191	1	384	2.09	2.01		34	3.3	2	1	1	1	2	19.72	2.07	1
31	0	37	0	150	46	20.44	122	81	41	73.35	111	1	1	7.22	81	0	393	1.89	1.06		27	3.74	2	2	1	2	1	7.68	0.81	2
32	1	40	0	170	69	23.88	147	92	55	58.44	141	1	1	5.45	126	1	555	2.24	1.11		40	0.441	2	1	1	2	1	52.04	5.46	2
33	1	23	0	173	66	22.05	154	98	56	7.07	66	1	1	15.79	864	1	412	2.15	1.68	107	30.4	5.42	3	2	1	1	3	39.41	4.14	3
34	1	40	0	170	71	24.57	120	74	46	49.69	127	1	1	5.91	145	1	482	2.31	1		42	0.506	1	1	1	2	2	41.18	4.32	2
35	1	38	0	165	65	23.88	120	60	60	62.47	131	0	1	5.95	120	1	472	2.188	0.76		41.3	0.287	1	1	1	1	1	54.78	5.75	3
36	0	26	0	154	53	22.35	115	67	48	132.35	130	0	0	2.82	54	0	268	2.097	1.19	36.14	36.9	0.7593	1	2	2	1	1	26.39	2.77	2
37	0	28	0	157	42	17.04	141	91	50	48.38	109	1	1	6.58	122	1	425	2.153	1.3	46	40	2.329	1	2	1	2	1	45.58	4.78	3
38	1	69	1	162	65	24.77	176	98	78	68.3	88	1	1	10.75	100	0	403	1.79	1.12		17.5	8.648	1	1	1	2	1	6.79	0.71	1
39	0	37	0	150	45	20	151	98	53	77.76	125	1	1	5.03	77	0	175	2.04	0.97		34	0.917	1	1	1	2	2	53.98	5.67	1
40	0	25	0	158	63	25.24	107	70	37	121.6	111	1	1	2.77	56	0	198	2.06	1.08	84.29	33.9	0.55	1	2	1	1	1	29.32	3.08	2
41	1	52	1	169	73	25.56	142	86	56	25.01	130	1	1	8.61	251	1	662	2.358		184.52	41.7	3.1457	1	2	1	2	2	44.81	4.7	2
42	0	46	1	157	52	21.1	106	66	40	88.89	119	1	0	4.34	66	0	213	2.24	1.22	42.9	35.7	0.187	2	1	1	1	1	63.96	6.71	2
43	0	64	1	150	38	16.89	103	60	43	48.11	74	1	1	5.58	106	1	218	1.93	0.68	51.45	23.8	1.15	3	2	1	2	2	43.94	4.61	2
44	0	55	1	160	65	25.39	169	99	70	34.56	140	1	1	5.47	145	1	416	2.31	1.21	57.88	40.9	1.338	1	2	1	1	3	64.16	6.73	2
45	1	51	1	159	67	26.5	130	83	47	72.62	102	1	0	7.08	100	0	511	2.33	0.85	45.42	38.3	0.928	1	2	1	2	1	49.44	5.19	1
46	0	28	0	158	40	16.02	107	68	39	91.86	112	1	0	5.39	70	0	284	1.97	1.91	44.71	28.7	2.07	1	2	2	2	1	22.69	2.38	1
47	0	40	0	162	64	24.39	118	59	59	96.49	125	0	0	3.68	63	0	248	2.294	1.24		39.7	0.08	1	1	1	1	1	64.84	6.81	2
48	1	15	0	165	49	18	117	60	57	171.16	103	1	0	5.3	59	0	448	2.358	1.85		39.6	0.65	1	2	1	1	1	49.56	5.2	3
49	0	31	0	150	48	21.33	112	80	32	103.5	122	1	0	4.59	62	0	482	2.17	1.05	62.26	40.3	1.29	1	2	1	1	2	26.7	2.8	2
50	1	43	1	165	55	20.2	125	75	50	52.73	127	1	1	5.74	136	1	427	2.43			31.6	4.7	1	1	1	1	1	65.09	6.83	2
51	1	18	0	178	74	23.36	123	76	47	114.42	158	1	0	2.74	81	0	479	2.43			45.9	0.97	1	1	1	1	1			3
52	0	26	0	150	48	21.33	117	71	46	123.17	111	1	1	4.98	55	0	388	2.26	1.15	48.75	34.9	1.6	1	2	1	1	1	31.77	3.34	2
53	1	26	0	175	105	34.29	160	89	71	149.08	153	1	1	3.68	51	0	372	2.26	1.09		41.5	0.68	1	2	1	1	1	47.91	5.03	1
54	1	28	0	170	63	21.8	104	61	43	75.86	135	0	1	3.07	107	1	371	2.4	0.93	86.81	46.5	0.26	1	2	2	1	1	62.32	6.54	1
55	0	35	0	155	50	20.81	103	66	37	97.35	107	0	1	3.12	64	0	283	2.12	2.88	13.9	37.5	0.189	1	1	1	2	1	73.31	7.7	2
56	0	33	0	163	73	27.48	128	87	41	112.84	123.2	1	1	5.09	65	0	355	2.35	1.05	40.6	43.4	0.9347	1	1	1	2	1	65.38	6.86	2
57	1	27	0	158	47	18.83	115	67	48	81.69	110	0	1	6.45	98	0	254	2.273	1.11		41	0.1275	1	1	1	2	1	86.44	9.07	2
58	1	31	0	168	50	17.72	118	70	48	62.69	147	1	1	5.62	80	0	417	2.34	1.36	37.96	44	0.6074	1	1	1	1	1	39.81	4.18	1
59	0	29	0	156	48	19.72	98	59	39	50.42	113	1	1	6.38	79	0	281	2.338	1.46		45.1	0.808	2	1	1	2	1	60.55	6.36	1
60	1	38	0	170	67	23.18	129	84	45	61.83	136.1	1	1	5.3	116	1	523	2.25	1.12		38.8	1.5536	1	1	2	2	2	55.17	5.79	3
61	1	49	1	163	60	22.58	177	94	83	68.1	104.6	1	1	5.97	115	1	437	2.04	3.19		36.4	2.1333	1	2	1	1	1	76.42	8.02	3
62	0	31	0	156	62	25.48	127	78	49	53.97	126	1	1	3.9	71	0	248	2.272	1.3	36.98	40	0.7225	1	1	1	2	2	31.63	3.32	2
63	1	27	0	166	70	25.4	137	80	57	53.82	165	1	1	7.69	145	1	611	2.32	2.17		43.2	2.8872	2	1	1	2	2	16.53	1.74	2
64	1	29	0	172	64	21.63	139	84	55	74.52	120	1	1	3.39	77	0	339	2.36	1.2		47.4	0.278	1	1	1	2	1			1
65	1	51	1	163	55	20.7	112	59	53	92.62	123	1	1	4.85	79	0	416	2.29	3.12		40.6	0.533	1	1	1	1	1	70.92	7.44	2
66	0	23	0	160	47	18.36	103	73	30	126.27	120	0	1	4.73	55	0	273	2.37	3.44		45.2	0.1346	1	1	1	1	1	62.19	6.53	2
67	1	17	0	170	55	19.03	107	58	49	111	123	1	1	5.05	75	0	505	2.432	1.61		42	0.4813	1	1	1	2	1	59.53	6.25	3
68	1	32	0	160	67	26.17	148	129	19	171.01	118	1	1	9.28	299	1	566	2.37	1.21		42.5	1.662	1	1	1	1	2	56.43	5.92	2
69	1	35	0	154	53	22.35	138	94	44	68.78	144	1	1	9.86	112	1	42	1.755	1.53	74.78	14.2	1.1905	1	1	1	1	1	19.11	2.01	2
70	1	19	0	174	66	21.8	118	81	37	138.26	132.9	1	1	5.81	69	0	408	1.817	1.2		17.7	6.828	1	2	2	2	2	6.79	0.71	2
71	1	35	0	170	72	24.91	131	71	60	114.53	149	1	1	4.16	72	0	406	2.18	1.27		41	0.51	1	1	1	1	1			3
72	0	32	0	162	64	24.39	115	68	47	90.9	130	1	0	5.55	69	0	305	2.134	1.24		39	0.15	1	1	1	1	1			1
73	1	20	0	164	67	24.91	135	83	52	132.55	156	1	0	3.67	70	0	403	2.429	1.62		46	0.1585	1	1	1	1	1	62.02	6.51	2
74	0	40	0	158	55	22.03	150	79	71	51.25	140	1	0	5.6	109	1	376	2.214	0.98	77.2	40	0.774	1	1	1	2	1			3
75	0	30	0	154	61	25.72	110	70	40	124.87	134	1	0	5.28	53	0	326	2.33	1.37	32.47	43	0.4486	1	1	1	2	1	79.94	7.55	2
76	0	33	0	157	54	21.91	102	64	38	134.08	120	1	0	3.56	49	0	179	2.144	0.88	74.23	40	0.5018	1	2	1	2	1	52.73	5.54	2
77	1	45	1	167	72	25.87	158	90	68	85.15	104	1	0	5.2	99	0	373	2.055	0.78		30.5	1.139	2	1	2	2	2			1
78	1	49	1	180	82	25.31	140	92	48	37.16	163	1	1	7.1	180	1	464	2.344	1.03	38.1	41	1.7505	1	1	1	2	3	58.65	6.16	2
79	1	15	0	168	54	19.13	136	89	47	189.58	139	1	1	3.52	54	0	206	2.193	1.23	43.02	35	1.1024	1	1	1	2	1	13.32	1.4	1
80	1	33	0	165	68	24.98	130	80	50	94.42	146	1	1	4.35	86	0	518	2.157	1.17	29.43	39	3.554	1	1	1	2	1	72.35	7.59	2
81	1	63	1	162	60.5	23.05	144	78	66	29.47	100.9	1	1	12.82	247	1	579	1.733	1.12		16.7	3.0867	1	1	2	1	1	15.88	1.67	1
82	0	19	0	157	47	19.07	111	67	44	91.77	127	1	1	4.37	75	0	295	2.236		11.97	43.1	0.1977	1	1	1	1	1	40.32	4.23	2
83	1	29	0	174	93	30.72	130	72	58	42.98	137	1	1	9.21	174	1	679	2.11	1.62	57.3	34		1	2	1	2	2	40.34	4.24	3
84	1	44	1	155	64	26.64	120	78	42	11	85	1	1	17.12	531	1	565	2.296	1.67	47.88	39.8	1.093	1	2	1	2	1	42.9	4.5	2
85	0	26	0	160	53	20.7	147	92	55	61.08	95	1	1	4.23	101	1	473	2.195	1.48	55.76	34.9	2.0714	1	1	1	2	2	20.24	2.13	2
86	1	57	1	170	63	21.8	149	84	65	105.87	118	1	1	3.52	68	0	417	2.229	1.35		37.6	0.4261	1	2	1	1	1	39.95	4.19	1
87	1	45	1	182	89	26.87	103	72	31	41.51	141	1	1	7.84	166	1	574	2.2	1.56		39.8	2.9384	1	2	1	1	3	14.34	1.51	2
88	1	38	0	177	78	24.9	137	90	47	71.3	152	1	1	5.27	107	1	375	2.189	1.34	69.2	40.1	1.432	1	1	1	2	1	53.79	5.65	3
89	1	30	0	173	80	26.73	138	92	46	53.97	176	1	1	8.42	142	1	559	2.109	1.08	72.56	37.4	5.59	1	1	1	2	1	19.97	2.1	2
90	1	27	0	166	58	21.05	121	67	54	116.97	133	1	1	5	74	0	326	2.274	1.15	33.66	40	1.12	1	2	1	1	1	35.67	3.74	3
91	0	36	0	156	67	27.53	106	68	38	85.87	134	1	1	4.35	71	0	313	2.082	1.02	48.33	36.9	1.28	1	1	1	1	2	23.56	2.47	1
92	1	30	0	165	54.5	20.02	125	72	53	67.1	122	1	1	7.71	135	1	436	2.331	0.9	48.85	37.3	0.4388	1	1	1	2	1	95.21	9.99	1
93	1	31	0	170	62.5	21.63	154	88	66	45.85	100	1	1	8.54	176	1	463	2.003	1.53	62.69	27.1	5.1238	1	1	1	2	2	17.86	1.87	2
94	1	45	1	172	76	25.69	144	80	64	49.7	102	1	1	11.42	142	1	502	2.22	1.14		37	2.415	1	1	1	2	2	43.01	4.51	1
95	0	28	0	161	58	22.38	119	78	41	141.97	130	1	1	4.84	48	0	344	2.22	1.69		36	0.73	1	1	1	2	1	53.38	5.6	2
96	1	51	1	166	62	22.5	123	78	45	136.17	128	1	1	4.82	58	0	279	1.98	0.95		28	5.116	1	1	1	1	1	46.84	4.92	2
97	0	33	0	162	59	22.48	102	53	49	98.52	116	1	1	5.13	64	0	241	2.26			39	0.35	1	2	1	1	1	35.87	3.77	3
98	1	26	0	171	64	21.89	128	93	35	92.84	120	1	1	4.56	91	0	294	2.32	1.03		45	0.79	1	1	1	2	1	50.6	5.31	3
99	0	47	1	161	55	21.22	134	89	45	78.78	142	1	1	4.31	73	0	192	2.25	1.71		43	0.53	1	1	1	2	2	46.12	4.84	2
100	1	37	0	160	74	28.91	156	97	59	36.73	120	1	1	9.14	191	1	384	2.09	2.01		34	3.3	2	1	1	1	2	19.72	2.07	1
101	0	37	0	150	46	20.44	122	81	41	73.35	111	1	0	7.22	81	0	393	1.89	1.06		27	3.74	2	2	1	2	1	7.68	0.81	2
102	1	40	0	170	69	23.88	147	92	55	58.44	141	1	0	5.45	126	1	555	2.24	1.11		40	0.441	2	1	1	2	1	52.04	5.46	2
103	1	23	0	173	66	22.05	154	98	56	7.07	66	1	0	15.79	864	1	412	2.15	1.68	107	30.4	5.42	3	2	1	1	3	39.41	4.14	3
104	1	40	0	170	71	24.57	120	74	46	49.69	127	1	0	5.91	145	1	482	2.31	1		42	0.506	1	1	1	2	2	41.18	4.32	2
105	1	38	0	165	65	23.88	120	60	60	62.47	131	0	0	5.95	120	1	472	2.188	0.76		41.3	0.287	1	1	1	1	1	54.78	5.75	3
106	0	26	0	154	53	22.35	115	67	48	132.35	130	0	0	2.82	54	0	268	2.097	1.19	36.14	36.9	0.7593	1	2	2	1	1	26.39	2.77	2
107	0	28	0	157	42	17.04	141	91	50	48.38	109	1	1	6.58	122	1	425	2.153	1.3	46	40	2.329	1	2	1	2	1	45.58	4.78	3
108	1	69	1	162	65	24.77	176	98	78	68.3	88	1	0	10.75	100	0	403	1.79	1.12		17.5	8.648	1	1	1	2	1	6.79	0.71	1
109	0	37	0	150	45	20	151	98	53	77.76	125	1	0	5.03	77	0	175	2.04	0.97		34	0.917	1	1	1	2	2	53.98	5.67	1
110	0	25	0	158	63	25.24	107	70	37	121.6	111	1	0	2.77	56	0	198	2.06	1.08	84.29	33.9	0.55	1	2	1	1	1	29.32	3.08	2
111	1	52	1	169	73	25.56	142	86	56	25.01	130	1	1	8.61	251	1	662	2.358		184.52	41.7	3.1457	1	2	1	2	2	44.81	4.7	2
112	0	46	1	157	52	21.1	106	66	40	88.89	119	1	0	4.34	66	0	213	2.24	1.22	42.9	35.7	0.187	2	1	1	1	1	63.96	6.71	2
113	0	64	1	150	38	16.89	103	60	43	48.11	74	1	1	5.58	106	1	218	1.93	0.68	51.45	23.8	1.15	3	2	1	2	2	43.94	4.61	2
114	0	55	1	160	65	25.39	169	99	70	34.56	140	1	1	5.47	145	1	416	2.31	1.21	57.88	40.9	1.338	1	2	1	1	3	64.16	6.73	2
115	1	51	1	159	67	26.5	130	83	47	72.62	102	1	0	7.08	100	0	511	2.33	0.85	45.42	38.3	0.928	1	2	1	2	1	49.44	5.19	1
116	0	28	0	158	40	16.02	107	68	39	91.86	112	1	0	5.39	70	0	284	1.97	1.91	44.71	28.7	2.07	1	2	2	2	1	22.69	2.38	1
117	0	40	0	162	64	24.39	118	59	59	96.49	125	0	0	3.68	63	0	248	2.294	1.24		39.7	0.08	1	1	1	1	1	64.84	6.81	2
118	1	15	0	165	49	18	117	60	57	171.16	103	1	1	5.3	59	0	448	2.358	1.85		39.6	0.65	1	2	1	1	1	49.56	5.2	3
119	0	31	0	150	48	21.33	112	80	32	103.5	122	1	0	4.59	62	0	482	2.17	1.05	62.26	40.3	1.29	1	2	1	1	2	26.7	2.8	2
120	1	43	1	165	55	20.2	125	75	50	52.73	127	1	1	5.74	136	1	427	2.43			31.6	4.7	1	1	1	1	1	65.09	6.83	2
121	1	18	0	178	74	23.36	123	76	47	114.42	158	1	0	2.74	81	0	479	2.43			45.9	0.97	1	1	1	1	1			3
122	0	26	0	150	48	21.33	117	71	46	123.17	111	1	1	4.98	55	0	388	2.26	1.15	48.75	34.9	1.6	1	2	1	1	1	31.77	3.34	2
123	1	26	0	175	105	34.29	160	89	71	149.08	153	1	1	3.68	51	0	372	2.26	1.09		41.5	0.68	1	2	1	1	1	47.91	5.03	1
124	1	28	0	170	63	21.8	104	61	43	75.86	135	0	1	3.07	107	1	371	2.4	0.93	86.81	46.5	0.26	1	2	2	1	1	62.32	6.54	1
125	0	35	0	155	50	20.81	103	66	37	97.35	107	0	1	3.12	64	0	283	2.12	2.88	13.9	37.5	0.189	1	1	1	2	1	73.31	7.7	2
126	0	33	0	163	73	27.48	128	87	41	112.84	123.2	1	1	5.09	65	0	355	2.35	1.05	40.6	43.4	0.9347	1	1	1	2	1	65.38	6.86	2
127	1	27	0	158	47	18.83	115	67	48	81.69	110	0	1	6.45	98	0	254	2.273	1.11		41	0.1275	1	1	1	2	1	86.44	9.07	2
128	1	31	0	168	50	17.72	118	70	48	62.69	147	1	1	5.62	80	0	417	2.34	1.36	37.96	44	0.6074	1	1	1	1	1	39.81	4.18	1
129	0	29	0	156	48	19.72	98	59	39	50.42	113	1	1	6.38	79	0	281	2.338	1.46		45.1	0.808	2	1	1	2	1	60.55	6.36	1
130	1	38	0	170	67	23.18	129	84	45	61.83	136.1	1	1	5.3	116	1	523	2.25	1.12		38.8	1.5536	1	1	2	2	2	55.17	5.79	3
131	1	49	1	163	60	22.58	177	94	83	68.1	104.6	1	1	5.97	115	1	437	2.04	3.19		36.4	2.1333	1	2	1	1	1	76.42	8.02	3
132	0	31	0	156	62	25.48	127	78	49	53.97	126	1	1	3.9	71	0	248	2.272	1.3	36.98	40	0.7225	1	1	1	2	2	31.63	3.32	2
133	1	27	0	166	70	25.4	137	80	57	53.82	165	1	1	7.69	145	1	611	2.32	2.17		43.2	2.8872	2	1	1	2	2	16.53	1.74	2
134	1	29	0	172	64	21.63	139	84	55	74.52	120	1	1	3.39	77	0	339	2.36	1.2		47.4	0.278	1	1	1	2	1			1
135	1	51	1	163	55	20.7	112	59	53	92.62	123	1	1	4.85	79	0	416	2.29	3.12		40.6	0.533	1	1	1	1	1	70.92	7.44	2
136	0	23	0	160	47	18.36	103	73	30	126.27	120	0	1	4.73	55	0	273	2.37	3.44		45.2	0.1346	1	1	1	1	1	62.19	6.53	2
137	1	17	0	170	55	19.03	107	58	49	111	123	1	1	5.05	75	0	505	2.432	1.61		42	0.4813	1	1	1	2	1	59.53	6.25	3
138	1	32	0	160	67	26.17	148	129	19	171.01	118	1	1	9.28	299	1	566	2.37	1.21		42.5	1.662	1	1	1	1	2	56.43	5.92	2
139	1	35	0	154	53	22.35	138	94	44	68.78	144	1	1	9.86	112	1	42	1.755	1.53	74.78	14.2	1.1905	1	1	1	1	1	19.11	2.01	2
140	1	19	0	174	66	21.8	118	81	37	138.26	132.9	1	1	5.81	69	0	408	1.817	1.2		17.7	6.828	1	2	2	2	2	6.79	0.71	2
141	1	35	0	170	72	24.91	131	71	60	114.53	149	1	1	4.16	72	0	406	2.18	1.27		41	0.51	1	1	1	1	1			3
142	0	32	0	162	64	24.39	115	68	47	90.9	130	1	1	5.55	69	0	305	2.134	1.24		39	0.15	1	1	1	1	1			1
143	1	20	0	164	67	24.91	135	83	52	132.55	156	1	1	3.67	70	0	403	2.429	1.62		46	0.1585	1	1	1	1	1	62.02	6.51	2
144	0	40	0	158	55	22.03	150	79	71	51.25	140	1	1	5.6	109	1	376	2.214	0.98	77.2	40	0.774	1	1	1	2	1			3
145	0	30	0	154	61	25.72	110	70	40	124.87	134	1	1	5.28	53	0	326	2.33	1.37	32.47	43	0.4486	1	1	1	2	1	79.94	7.55	2
146	0	33	0	157	54	21.91	102	64	38	134.08	120	1	1	3.56	49	0	179	2.144	0.88	74.23	40	0.5018	1	2	1	2	1	52.73	5.54	2
147	1	45	1	167	72	25.87	158	90	68	85.15	104	1	1	5.2	99	0	373	2.055	0.78		30.5	1.139	2	1	2	2	2			1
148	1	49	1	180	82	25.31	140	92	48	37.16	163	1	1	7.1	180	1	464	2.344	1.03	38.1	41	1.7505	1	1	1	2	3	58.65	6.16	2
149	1	15	0	168	54	19.13	136	89	47	189.58	139	1	1	3.52	54	0	206	2.193	1.23	43.02	35	1.1024	1	1	1	2	1	13.32	1.4	1
150	1	33	0	165	68	24.98	130	80	50	94.42	146	1	1	4.35	86	0	518	2.157	1.17	29.43	39	3.554	1	1	1	2	1	72.35	7.59	2
151	1	63	1	162	60.5	23.05	144	78	66	29.47	100.9	1	1	12.82	247	1	579	1.733	1.12		16.7	3.0867	1	1	2	1	1	15.88	1.67	1
152	0	19	0	157	47	19.07	111	67	44	91.77	127	1	1	4.37	75	0	295	2.236		11.97	43.1	0.1977	1	1	1	1	1	40.32	4.23	2
153	1	29	0	174	93	30.72	130	72	58	42.98	137	1	1	9.21	174	1	679	2.11	1.62	57.3	34		1	2	1	2	2	40.34	4.24	3
154	1	44	1	155	64	26.64	120	78	42	11	85	1	1	17.12	531	1	565	2.296	1.67	47.88	39.8	1.093	1	2	1	2	1	42.9	4.5	2
155	0	26	0	160	53	20.7	147	92	55	61.08	95	1	1	4.23	101	1	473	2.195	1.48	55.76	34.9	2.0714	1	1	1	2	2	20.24	2.13	2
156	1	57	1	170	63	21.8	149	84	65	105.87	118	1	1	3.52	68	0	417	2.229	1.35		37.6	0.4261	1	2	1	1	1	39.95	4.19	1
157	1	45	1	182	89	26.87	103	72	31	41.51	141	1	1	7.84	166	1	574	2.2	1.56		39.8	2.9384	1	2	1	1	3	14.34	1.51	2
158	1	38	0	177	78	24.9	137	90	47	71.3	152	1	1	5.27	107	1	375	2.189	1.34	69.2	40.1	1.432	1	1	1	2	1	53.79	5.65	3
159	1	30	0	173	80	26.73	138	92	46	53.97	176	1	1	8.42	142	1	559	2.109	1.08	72.56	37.4	5.59	1	1	1	2	1	19.97	2.1	2
160	1	27	0	166	58	21.05	121	67	54	116.97	133	1	1	5	74	0	326	2.274	1.15	33.66	40	1.12	1	2	1	1	1	35.67	3.74	3
161	0	36	0	156	67	27.53	106	68	38	85.87	134	1	1	4.35	71	0	313	2.082	1.02	48.33	36.9	1.28	1	1	1	1	2	23.56	2.47	1
162	1	30	0	165	54.5	20.02	125	72	53	67.1	122	1	1	7.71	135	1	436	2.331	0.9	48.85	37.3	0.4388	1	1	1	2	1	95.21	9.99	1
163	1	31	0	170	62.5	21.63	154	88	66	45.85	100	1	1	8.54	176	1	463	2.003	1.53	62.69	27.1	5.1238	1	1	1	2	2	17.86	1.87	2
164	1	45	1	172	76	25.69	144	80	64	49.7	102	1	1	11.42	142	1	502	2.22	1.14		37	2.415	1	1	1	2	2	43.01	4.51	1
165	0	28	0	161	58	22.38	119	78	41	141.97	130	1	1	4.84	48	0	344	2.22	1.69		36	0.73	1	1	1	2	1	53.38	5.6	2
166	1	51	1	166	62	22.5	123	78	45	136.17	128	1	1	4.82	58	0	279	1.98	0.95		28	5.116	1	1	1	1	1	46.84	4.92	2
167	0	33	0	162	59	22.48	102	53	49	98.52	116	1	1	5.13	64	0	241	2.26			39	0.35	1	2	1	1	1	35.87	3.77	3
168	1	26	0	171	64	21.89	128	93	35	92.84	120	1	1	4.56	91	0	294	2.32	1.03		45	0.79	1	1	1	2	1	50.6	5.31	3
169	0	47	1	161	55	21.22	134	89	45	78.78	142	1	1	4.31	73	0	192	2.25	1.71		43	0.53	1	1	1	2	2	46.12	4.84	2
170	1	37	0	160	74	28.91	156	97	59	36.73	120	1	1	9.14	191	1	384	2.09	2.01		34	3.3	2	1	1	1	2	19.72	2.07	1
171	0	37	0	150	46	20.44	122	81	41	73.35	111	1	1	7.22	81	0	393	1.89	1.06		27	3.74	2	2	1	2	1	7.68	0.81	2
172	1	40	0	170	69	23.88	147	92	55	58.44	141	1	1	5.45	126	1	555	2.24	1.11		40	0.441	2	1	1	2	1	52.04	5.46	2
173	1	23	0	173	66	22.05	154	98	56	7.07	66	1	1	15.79	864	1	412	2.15	1.68	107	30.4	5.42	3	2	1	1	3	39.41	4.14	3
174	1	40	0	170	71	24.57	120	74	46	49.69	127	1	1	5.91	145	1	482	2.31	1		42	0.506	1	1	1	2	2	41.18	4.32	2
175	1	38	0	165	65	23.88	120	60	60	62.47	131	0	1	5.95	120	1	472	2.188	0.76		41.3	0.287	1	1	1	1	1	54.78	5.75	3
176	0	26	0	154	53	22.35	115	67	48	132.35	130	0	0	2.82	54	0	268	2.097	1.19	36.14	36.9	0.7593	1	2	2	1	1	26.39	2.77	2
177	0	28	0	157	42	17.04	141	91	50	48.38	109	1	1	6.58	122	1	425	2.153	1.3	46	40	2.329	1	2	1	2	1	45.58	4.78	3
178	1	69	1	162	65	24.77	176	98	78	68.3	88	1	1	10.75	100	0	403	1.79	1.12		17.5	8.648	1	1	1	2	1	6.79	0.71	1
179	0	37	0	150	45	20	151	98	53	77.76	125	1	1	5.03	77	0	175	2.04	0.97		34	0.917	1	1	1	2	2	53.98	5.67	1
180	0	25	0	158	63	25.24	107	70	37	121.6	111	1	1	2.77	56	0	198	2.06	1.08	84.29	33.9	0.55	1	2	1	1	1	29.32	3.08	2
181	1	52	1	169	73	25.56	142	86	56	25.01	130	1	1	8.61	251	1	662	2.358		184.52	41.7	3.1457	1	2	1	2	2	44.81	4.7	2
182	0	46	1	157	52	21.1	106	66	40	88.89	119	1	1	4.34	66	0	213	2.24	1.22	42.9	35.7	0.187	2	1	1	1	1	63.96	6.71	2
183	0	64	1	150	38	16.89	103	60	43	48.11	74	1	1	5.58	106	1	218	1.93	0.68	51.45	23.8	1.15	3	2	1	2	2	43.94	4.61	2
184	0	55	1	160	65	25.39	169	99	70	34.56	140	1	1	5.47	145	1	416	2.31	1.21	57.88	40.9	1.338	1	2	1	1	3	64.16	6.73	2
185	1	51	1	159	67	26.5	130	83	47	72.62	102	1	1	7.08	100	0	511	2.33	0.85	45.42	38.3	0.928	1	2	1	2	1	49.44	5.19	1
186	0	28	0	158	40	16.02	107	68	39	91.86	112	1	1	5.39	70	0	284	1.97	1.91	44.71	28.7	2.07	1	2	2	2	1	22.69	2.38	1
187	0	40	0	162	64	24.39	118	59	59	96.49	125	0	1	3.68	63	0	248	2.294	1.24		39.7	0.08	1	1	1	1	1	64.84	6.81	2
188	1	15	0	165	49	18	117	60	57	171.16	103	1	1	5.3	59	0	448	2.358	1.85		39.6	0.65	1	2	1	1	1	49.56	5.2	3
189	0	31	0	150	48	21.33	112	80	32	103.5	122	1	0	4.59	62	0	482	2.17	1.05	62.26	40.3	1.29	1	2	1	1	2	26.7	2.8	2
190	1	43	1	165	55	20.2	125	75	50	52.73	127	1	1	5.74	136	1	427	2.43			31.6	4.7	1	1	1	1	1	65.09	6.83	2
191	1	18	0	178	74	23.36	123	76	47	114.42	158	1	1	2.74	81	0	479	2.43			45.9	0.97	1	1	1	1	1			3
192	0	26	0	150	48	21.33	117	71	46	123.17	111	1	1	4.98	55	0	388	2.26	1.15	48.75	34.9	1.6	1	2	1	1	1	31.77	3.34	2
193	1	26	0	175	105	34.29	160	89	71	149.08	153	1	1	3.68	51	0	372	2.26	1.09		41.5	0.68	1	2	1	1	1	47.91	5.03	1
194	1	28	0	170	63	21.8	104	61	43	75.86	135	0	1	3.07	107	1	371	2.4	0.93	86.81	46.5	0.26	1	2	2	1	1	62.32	6.54	1
195	0	35	0	155	50	20.81	103	66	37	97.35	107	0	1	3.12	64	0	283	2.12	2.88	13.9	37.5	0.189	1	1	1	2	1	73.31	7.7	2
196	0	33	0	163	73	27.48	128	87	41	112.84	123.2	1	1	5.09	65	0	355	2.35	1.05	40.6	43.4	0.9347	1	1	1	2	1	65.38	6.86	2
197	1	27	0	158	47	18.83	115	67	48	81.69	110	0	1	6.45	98	0	254	2.273	1.11		41	0.1275	1	1	1	2	1	86.44	9.07	2
198	1	31	0	168	50	17.72	118	70	48	62.69	147	1	1	5.62	80	0	417	2.34	1.36	37.96	44	0.6074	1	1	1	1	1	39.81	4.18	1
199	0	29	0	156	48	19.72	98	59	39	50.42	113	1	1	6.38	79	0	281	2.338	1.46		45.1	0.808	2	1	1	2	1	60.55	6.36	1
200	1	38	0	170	67	23.18	129	84	45	61.83	136.1	1	1	5.3	116	1	523	2.25	1.12		38.8	1.5536	1	1	2	2	2	55.17	5.79	3
201	1	49	1	163	60	22.58	177	94	83	68.1	104.6	1	1	5.97	115	1	437	2.04	3.19		36.4	2.1333	1	2	1	1	1	76.42	8.02	3
202	0	31	0	156	62	25.48	127	78	49	53.97	126	1	1	3.9	71	0	248	2.272	1.3	36.98	40	0.7225	1	1	1	2	2	31.63	3.32	2
203	1	27	0	166	70	25.4	137	80	57	53.82	165	1	1	7.69	145	1	611	2.32	2.17		43.2	2.8872	2	1	1	2	2	16.53	1.74	2
204	1	29	0	172	64	21.63	139	84	55	74.52	120	1	1	3.39	77	0	339	2.36	1.2		47.4	0.278	1	1	1	2	1			1
205	1	51	1	163	55	20.7	112	59	53	92.62	123	1	1	4.85	79	0	416	2.29	3.12		40.6	0.533	1	1	1	1	1	70.92	7.44	2
206	0	23	0	160	47	18.36	103	73	30	126.27	120	0	1	4.73	55	0	273	2.37	3.44		45.2	0.1346	1	1	1	1	1	62.19	6.53	2
207	1	17	0	170	55	19.03	107	58	49	111	123	1	1	5.05	75	0	505	2.432	1.61		42	0.4813	1	1	1	2	1	59.53	6.25	3
208	1	32	0	160	67	26.17	148	129	19	171.01	118	1	1	9.28	299	1	566	2.37	1.21		42.5	1.662	1	1	1	1	2	56.43	5.92	2
209	1	35	0	154	53	22.35	138	94	44	68.78	144	1	1	9.86	112	1	42	1.755	1.53	74.78	14.2	1.1905	1	1	1	1	1	19.11	2.01	2
210	1	19	0	174	66	21.8	118	81	37	138.26	132.9	1	1	5.81	69	0	408	1.817	1.2		17.7	6.828	1	2	2	2	2	6.79	0.71	2
211	0	40	0	158	55	22.03	150	79	71	51.25	140	1	1	5.6	109	1	376	2.214	0.98	77.2	40	0.774	1	1	1	2	1			3
212	0	26	0	160	53	20.7	147	92	55	61.08	95	1	1	4.23	101	1	473	2.195	1.48	55.76	34.9	2.0714	1	1	1	2	2	20.24	2.13	2
213	0	28	0	157	42	17.04	141	91	50	48.38	109	1	1	6.58	122	1	425	2.153	1.3	46	40	2.329	1	2	1	2	1	45.58	4.78	3
214	0	40	0	158	55	22.03	150	79	71	51.25	140	1	1	5.6	109	1	376	2.214	0.98	77.2	40	0.774	1	1	1	2	1			3
215	0	26	0	160	53	20.7	147	92	55	61.08	95	1	1	4.23	101	1	473	2.195	1.48	55.76	34.9	2.0714	1	1	1	2	2	20.24	2.13	2
216	0	28	0	157	42	17.04	141	91	50	48.38	109	1	1	6.58	122	1	425	2.153	1.3	46	40	2.329	1	2	1	2	1	45.58	4.78	3
217	0	40	0	158	55	22.03	150	79	71	51.25	140	1	1	5.6	109	1	376	2.214	0.98	77.2	40	0.774	1	1	1	2	1			3
218	0	26	0	160	53	20.7	147	92	55	61.08	95	1	1	4.23	101	1	473	2.195	1.48	55.76	34.9	2.0714	1	1	1	2	2	20.24	2.13	2
219	0	28	0	157	42	17.04	141	91	50	48.38	109	1	1	6.58	122	1	425	2.153	1.3	46	40	2.329	1	2	1	2	1	45.58	4.78	3
220	0	40	0	158	55	22.03	150	79	71	51.25	140	1	1	5.6	109	1	376	2.214	0.98	77.2	40	0.774	1	1	1	2	1			3
221	0	26	0	160	53	20.7	147	92	55	61.08	95	1	1	4.23	101	1	473	2.195	1.48	55.76	34.9	2.0714	1	1	1	2	2	20.24	2.13	2
222	0	28	0	157	42	17.04	141	91	50	48.38	109	1	1	6.58	122	1	425	2.153	1.3	46	40	2.329	1	2	1	2	1	45.58	4.78	3
223	0	40	0	158	55	22.03	150	79	71	51.25	140	1	1	5.6	109	1	376	2.214	0.98	77.2	40	0.774	1	1	1	2	1			3
224	0	26	0	160	53	20.7	147	92	55	61.08	95	1	1	4.23	101	1	473	2.195	1.48	55.76	34.9	2.0714	1	1	1	2	2	20.24	2.13	2
225	0	28	0	157	42	17.04	141	91	50	48.38	109	1	1	6.58	122	1	425	2.153	1.3	46	40	2.329	1	2	1	2	1	45.58	4.78	3
226	0	40	0	158	55	22.03	150	79	71	51.25	140	1	1	5.6	109	1	376	2.214	0.98	77.2	40	0.774	1	1	1	2	1			3
227	0	26	0	160	53	20.7	147	92	55	61.08	95	1	1	4.23	101	1	473	2.195	1.48	55.76	34.9	2.0714	1	1	1	2	2	20.24	2.13	2
228	0	28	0	157	42	17.04	141	91	50	48.38	109	1	1	6.58	122	1	425	2.153	1.3	46	40	2.329	1	2	1	2	1	45.58	4.78	3
229	0	40	0	158	55	22.03	150	79	71	51.25	140	1	1	5.6	109	1	376	2.214	0.98	77.2	40	0.774	1	1	1	2	1			3
230	0	26	0	160	53	20.7	147	92	55	61.08	95	1	0	4.23	101	1	473	2.195	1.48	55.76	34.9	2.0714	1	1	1	2	2	20.24	2.13	2
231	0	28	0	157	42	17.04	141	91	50	48.38	109	1	1	6.58	122	1	425	2.153	1.3	46	40	2.329	1	2	1	2	1	45.58	4.78	3
232	0	40	0	158	55	22.03	150	79	71	51.25	140	1	0	5.6	109	1	376	2.214	0.98	77.2	40	0.774	1	1	1	2	1			3
233	0	26	0	160	53	20.7	147	92	55	61.08	95	1	0	4.23	101	1	473	2.195	1.48	55.76	34.9	2.0714	1	1	1	2	2	20.24	2.13	2
234	0	28	0	157	42	17.04	141	91	50	48.38	109	1	1	6.58	122	1	425	2.153	1.3	46	40	2.329	1	2	1	2	1	45.58	4.78	3
235	0	40	0	158	55	22.03	150	79	71	51.25	140	1	0	5.6	109	1	376	2.214	0.98	77.2	40	0.774	1	1	1	2	1			3
236	0	26	0	160	53	20.7	147	92	55	61.08	95	1	0	4.23	101	1	473	2.195	1.48	55.76	34.9	2.0714	1	1	1	2	2	20.24	2.13	2
237	0	28	0	157	42	17.04	141	91	50	48.38	109	1	1	6.58	122	1	425	2.153	1.3	46	40	2.329	1	2	1	2	1	45.58	4.78	3
238	0	40	0	158	55	22.03	150	79	71	51.25	140	1	0	5.6	109	1	376	2.214	0.98	77.2	40	0.774	1	1	1	2	1			3
239	0	26	0	160	53	20.7	147	92	55	61.08	95	1	0	4.23	101	1	473	2.195	1.48	55.76	34.9	2.0714	1	1	1	2	2	20.24	2.13	2
240	0	28	0	157	42	17.04	141	91	50	48.38	109	1	1	6.58	122	1	425	2.153	1.3	46	40	2.329	1	2	1	2	1	45.58	4.78	3
241	0	40	0	158	55	22.03	150	79	71	51.25	140	1	0	5.6	109	1	376	2.214	0.98	77.2	40	0.774	1	1	1	2	1			3
242	0	26	0	160	53	20.7	147	92	55	61.08	95	1	0	4.23	101	1	473	2.195	1.48	55.76	34.9	2.0714	1	1	1	2	2	20.24	2.13	2
243	0	28	0	157	42	17.04	141	91	50	48.38	109	1	1	6.58	122	1	425	2.153	1.3	46	40	2.329	1	2	1	2	1	45.58	4.78	3
244	0	40	0	158	55	22.03	150	79	71	51.25	140	1	0	5.6	109	1	376	2.214	0.98	77.2	40	0.774	1	1	1	2	1			3
245	0	26	0	160	53	20.7	147	92	55	61.08	95	1	0	4.23	101	1	473	2.195	1.48	55.76	34.9	2.0714	1	1	1	2	2	20.24	2.13	2
246	0	28	0	157	42	17.04	141	91	50	48.38	109	1	1	6.58	122	1	425	2.153	1.3	46	40	2.329	1	2	1	2	1	45.58	4.78	3
247	0	26	0	160	53	20.7	147	92	55	61.08	95	1	0	4.23	101	1	473	2.195	1.48	55.76	34.9	2.0714	1	1	1	2	2	20.24	2.13	2
248	0	28	0	157	42	17.04	141	91	50	48.38	109	1	1	6.58	122	1	425	2.153	1.3	46	40	2.329	1	2	1	2	1	45.58	4.78	3
249	0	26	0	160	53	20.7	147	92	55	61.08	95	1	0	4.23	101	1	473	2.195	1.48	55.76	34.9	2.0714	1	1	1	2	2	20.24	2.13	2
250	0	28	0	157	42	17.04	141	91	50	48.38	109	1	1	6.58	122	1	425	2.153	1.3	46	40	2.329	1	2	1	2	1	45.58	4.78	3
251	0	26	0	160	53	20.7	147	92	55	61.08	95	1	0	4.23	101	1	473	2.195	1.48	55.76	34.9	2.0714	1	1	1	2	2	20.24	2.13	2
252	0	28	0	157	42	17.04	141	91	50	48.38	109	1	1	6.58	122	1	425	2.153	1.3	46	40	2.329	1	2	1	2	1	45.58	4.78	3
253	0	26	0	160	53	20.7	147	92	55	61.08	95	1	0	4.23	101	1	473	2.195	1.48	55.76	34.9	2.0714	1	1	1	2	2	20.24	2.13	2
254	0	28	0	157	42	17.04	141	91	50	48.38	109	1	1	6.58	122	1	425	2.153	1.3	46	40	2.329	1	2	1	2	1	45.58	4.78	3
255	0	26	0	160	53	20.7	147	92	55	61.08	95	1	0	4.23	101	1	473	2.195	1.48	55.76	34.9	2.0714	1	1	1	2	2	20.24	2.13	2
256	0	28	0	157	42	17.04	141	91	50	48.38	109	1	1	6.58	122	1	425	2.153	1.3	46	40	2.329	1	2	1	2	1	45.58	4.78	3
257	0	26	0	160	53	20.7	147	92	55	61.08	95	1	0	4.23	101	1	473	2.195	1.48	55.76	34.9	2.0714	1	1	1	2	2	20.24	2.13	2
258	0	28	0	157	42	17.04	141	91	50	48.38	109	1	1	6.58	122	1	425	2.153	1.3	46	40	2.329	1	2	1	2	1	45.58	4.78	3
259	0	26	0	160	53	20.7	147	92	55	61.08	95	1	0	4.23	101	1	473	2.195	1.48	55.76	34.9	2.0714	1	1	1	2	2	20.24	2.13	2
260	0	28	0	157	42	17.04	141	91	50	48.38	109	1	1	6.58	122	1	425	2.153	1.3	46	40	2.329	1	2	1	2	1	45.58	4.78	3
261	0	26	0	160	53	20.7	147	92	55	61.08	95	1	0	4.23	101	1	473	2.195	1.48	55.76	34.9	2.0714	1	1	1	2	2	20.24	2.13	2
262	0	28	0	157	42	17.04	141	91	50	48.38	109	1	1	6.58	122	1	425	2.153	1.3	46	40	2.329	1	2	1	2	1	45.58	4.78	3
263	0	26	0	160	53	20.7	147	92	55	61.08	95	1	0	4.23	101	1	473	2.195	1.48	55.76	34.9	2.0714	1	1	1	2	2	20.24	2.13	2
264	0	26	0	160	53	20.7	147	92	55	61.08	95	1	0	4.23	101	1	473	2.195	1.48	55.76	34.9	2.0714	1	1	1	2	2	20.24	2.13	2
265	0	28	0	157	42	17.04	141	91	50	48.38	109	1	1	6.58	122	1	425	2.153	1.3	46	40	2.329	1	2	1	2	1	45.58	4.78	3
266	0	26	0	160	53	20.7	147	92	55	61.08	95	1	0	4.23	101	1	473	2.195	1.48	55.76	34.9	2.0714	1	1	1	2	2	20.24	2.13	2
267	0	28	0	157	42	17.04	141	91	50	48.38	109	1	1	6.58	122	1	425	2.153	1.3	46	40	2.329	1	2	1	2	1	45.58	4.78	3
268	0	26	0	160	53	20.7	147	92	55	61.08	95	1	0	4.23	101	1	473	2.195	1.48	55.76	34.9	2.0714	1	1	1	2	2	20.24	2.13	2
269	0	28	0	157	42	17.04	141	91	50	48.38	109	1	1	6.58	122	1	425	2.153	1.3	46	40	2.329	1	2	1	2	1	45.58	4.78	3
270	0	26	0	160	53	20.7	147	92	55	61.08	95	1	0	4.23	101	1	473	2.195	1.48	55.76	34.9	2.0714	1	1	1	2	2	20.24	2.13	2
271	0	28	0	157	42	17.04	141	91	50	48.38	109	1	1	6.58	122	1	425	2.153	1.3	46	40	2.329	1	2	1	2	1	45.58	4.78	3
272	0	26	0	160	53	20.7	147	92	55	61.08	95	1	0	4.23	101	1	473	2.195	1.48	55.76	34.9	2.0714	1	1	1	2	2	20.24	2.13	2
273	0	28	0	157	42	17.04	141	91	50	48.38	109	1	1	6.58	122	1	425	2.153	1.3	46	40	2.329	1	2	1	2	1	45.58	4.78	3
274	0	26	0	160	53	20.7	147	92	55	61.08	95	1	0	4.23	101	1	473	2.195	1.48	55.76	34.9	2.0714	1	1	1	2	2	20.24	2.13	2
275	0	28	0	157	42	17.04	141	91	50	48.38	109	1	1	6.58	122	1	425	2.153	1.3	46	40	2.329	1	2	1	2	1	45.58	4.78	3
276	0	26	0	160	53	20.7	147	92	55	61.08	95	1	0	4.23	101	1	473	2.195	1.48	55.76	34.9	2.0714	1	1	1	2	2	20.24	2.13	2
277	0	28	0	157	42	17.04	141	91	50	48.38	109	1	1	6.58	122	1	425	2.153	1.3	46	40	2.329	1	2	1	2	1	45.58	4.78	3
278	0	26	0	160	53	20.7	147	92	55	61.08	95	1	0	4.23	101	1	473	2.195	1.48	55.76	34.9	2.0714	1	1	1	2	2	20.24	2.13	2
279	0	28	0	157	42	17.04	141	91	50	48.38	109	1	1	6.58	122	1	425	2.153	1.3	46	40	2.329	1	2	1	2	1	45.58	4.78	3
280	0	26	0	160	53	20.7	147	92	55	61.08	95	1	0	4.23	101	1	473	2.195	1.48	55.76	34.9	2.0714	1	1	1	2	2	20.24	2.13	2
281	0	28	0	157	42	17.04	141	91	50	48.38	109	1	1	6.58	122	1	425	2.153	1.3	46	40	2.329	1	2	1	2	1	45.58	4.78	3
282	0	26	0	160	53	20.7	147	92	55	61.08	95	1	0	4.23	101	1	473	2.195	1.48	55.76	34.9	2.0714	1	1	1	2	2	20.24	2.13	2

## Sheet: Sheet2
number	gender	age	age>40	height	weight	BMI	SBP	DBP	pulse pressure	eGFR	Hb	PRO	ERY	BUN	Scr	gfr	renal dysfunction or not	UA	Ca	P	iPTH	ALB	24hUpro	C	M	E	S	T	25(OH)2D3	25(OH)2D2	Genotypes
1	1	35	0	170	72	24.91	131	71	60	114.53	149	1	1	4.16	72	119.3	0	406	2.18	1.27		41	0.51	1	1	1	1	1			3
2	0	32	0	162	64	24.39	115	68	47	90.9	130	1	1	5.55	69	105.71	0	305	2.134	1.24		39	0.15	1	1	1	1	1			1
3	1	20	0	164	67	24.91	135	83	52	132.55	156	1	1	3.67	70	136.53	0	403	2.429	1.62		46	0.1585	1	1	1	1	1	62.02	6.51	2
4	0	40	0	158	55	22.03	150	79	71	51.25	140	1	0	5.6	109	57.47	1	376	2.214	0.98	77.2	40	0.774	1	1	1	2	1			3
5	0	30	0	154	61	25.72	110	70	40	124.87	134	1	1	5.28	53	128.68	0	326	2.33	1.37	32.47	43	0.4486	1	1	1	2	1	79.94	7.55	2
6	0	33	0	157	54	21.91	102	64	38	134.08	120	1	1	3.56	49	129.28	0	179	2.144	0.88	74.23	40	0.5018	1	2	1	2	1	52.73	5.54	2
7	1	45	1	167	72	25.87	158	90	68	85.15	104	1	1	5.2	99	83.37	0	373	2.055	0.78		30.5	1.139	2	1	2	2	2			1
8	1	49	1	180	82	25.31	140	92	48	37.16	163	1	1	7.1	180	39.32	1	464	2.344	1.03	38.1	41	1.7505	1	1	1	2	3	58.65	6.16	2
9	1	15	0	168	54	19.13	136	89	47	189.58	139	1	1	3.52	54	198	0	206	2.193	1.23	43.02	35	1.1024	1	1	1	2	1	13.32	1.4	1
10	1	33	0	165	68	24.98	130	80	50	94.42	146	1	1	4.35	86	107.55	0	518	2.157	1.17	29.43	39	3.554	1	1	1	2	1	72.35	7.59	2
11	1	63	1	162	60.5	23.05	144	78	66	29.47	100.9	1	1	12.82	247	24.3	1	579	1.733	1.12		16.7	3.0867	1	1	2	1	1	15.88	1.67	1
12	0	19	0	157	47	19.07	111	67	44	91.77	127	1	1	4.37	75	104.7	0	295	2.236		11.97	43.1	0.1977	1	1	1	1	1	40.32	4.23	2
13	1	29	0	174	93	30.72	130	72	58	42.98	137	1	1	9.21	174	47.15	1	679	2.11	1.62	57.3	34		1	2	1	2	2	40.34	4.24	3
14	1	44	1	155	64	26.64	120	78	42	11	85	1	1	17.12	531	11	1	565	2.296	1.67	47.88	39.8	1.093	1	2	1	2	1	42.9	4.5	2
15	0	26	0	160	53	20.7	147	92	55	61.08	95	1	0	4.23	101	69.54	0	473	2.195	1.48	55.76	34.9	2.0714	1	1	1	2	2	20.24	2.13	2
16	1	57	1	170	63	21.8	149	84	65	105.87	118	1	1	3.52	68	117.31	0	417	2.229	1.35		37.6	0.4261	1	2	1	1	1	39.95	4.19	1
17	1	45	1	182	89	26.87	103	72	31	41.51	141	1	1	7.84	166	44.61	1	574	2.2	1.56		39.8	2.9384	1	2	1	1	3	14.34	1.51	2
18	1	38	0	177	78	24.9	137	90	47	71.3	152	1	1	5.27	107	79.72	0	375	2.189	1.34	69.2	40.1	1.432	1	1	1	2	1	53.79	5.65	3
19	1	30	0	173	80	26.73	138	92	46	53.97	176	1	1	8.42	142	59.87	1	559	2.109	1.08	72.56	37.4	5.59	1	1	1	2	1	19.97	2.1	2
20	1	27	0	166	58	21.05	121	67	54	116.97	133	1	1	5	74	120.81	0	326	2.274	1.15	33.66	40	1.12	1	2	1	1	1	35.67	3.74	3
21	0	36	0	156	67	27.53	106	68	38	85.87	134	1	1	4.35	71	99.29	0	313	2.082	1.02	48.33	36.9	1.28	1	1	1	1	2	23.56	2.47	1
22	1	30	0	165	54.5	20.02	125	72	53	67.1	122	1	1	7.71	135	63.65	0	436	2.331	0.9	48.85	37.3	0.4388	1	1	1	2	1	95.21	9.99	1
23	1	31	0	170	62.5	21.63	154	88	66	45.85	100	1	1	8.54	176	45.85	1	463	2.003	1.53	62.69	27.1	5.1238	1	1	1	2	2	17.86	1.87	2
24	1	45	1	172	76	25.69	144	80	64	49.7	102	1	1	11.42	142	53.89	1	502	2.22	1.14		37	2.415	1	1	1	2	2	43.01	4.51	1
25	0	28	0	161	58	22.38	119	78	41	141.97	130	1	1	4.84	48	134.81	0	344	2.22	1.69		36	0.73	1	1	1	2	1	53.38	5.6	2
26	1	51	1	166	62	22.5	123	78	45	136.17	128	1	1	4.82	58	145.62	0	279	1.98	0.95		28	5.116	1	1	1	1	1	46.84	4.92	2
27	0	33	0	162	59	22.48	102	53	49	98.52	116	1	1	5.13	64	114.97	0	241	2.26			39	0.35	1	2	1	1	1	35.87	3.77	3
28	1	26	0	171	64	21.89	128	93	35	92.84	120	1	1	4.56	91	105.5	0	294	2.32	1.03		45	0.79	1	1	1	2	1	50.6	5.31	3
29	0	47	1	161	55	21.22	134	89	45	78.78	142	1	1	4.31	73	88.87	0	192	2.25	1.71		43	0.53	1	1	1	2	2	46.12	4.84	2
30	1	37	0	160	74	28.91	156	97	59	36.73	120	1	1	9.14	191	39.82	1	384	2.09	2.01		34	3.3	2	1	1	1	2	19.72	2.07	1
31	0	37	0	150	46	20.44	122	81	41	73.35	111	1	1	7.22	81	84.06	0	393	1.89	1.06		27	3.74	2	2	1	2	1	7.68	0.81	2
32	1	40	0	170	69	23.88	147	92	55	58.44	141	1	1	5.45	126	64.5	0	555	2.24	1.11		40	0.441	2	1	1	2	1	52.04	5.46	2
33	1	23	0	173	66	22.05	154	98	56	7.07	66	1	1	15.79	864	7.07	1	412	2.15	1.68	107	30.4	5.42	3	2	1	1	3	39.41	4.14	3
34	1	40	0	170	71	24.57	120	74	46	49.69	127	1	1	5.91	145	54.42	1	482	2.31	1		42	0.506	1	1	1	2	2	41.18	4.32	2
35	1	38	0	165	65	23.88	120	60	60	62.47	131	0	1	5.95	120	69.39	0	472	2.188	0.76		41.3	0.287	1	1	1	1	1	54.78	5.75	3
36	0	26	0	154	53	22.35	115	67	48	132.35	130	0	0	2.82	54	131.54	0	268	2.097	1.19	36.14	36.9	0.7593	1	2	2	1	1	26.39	2.77	2
37	0	28	0	157	42	17.04	141	91	50	48.38	109	1	1	6.58	122	54.56	1	425	2.153	1.3	46	40	2.329	1	2	1	2	1	45.58	4.78	3
38	1	69	1	162	65	24.77	176	98	78	68.3	88	1	1	10.75	100	69.59	0	403	1.79	1.12		17.5	8.648	1	1	1	2	1	6.79	0.71	1
39	0	37	0	150	45	20	151	98	53	77.76	125	1	1	5.03	77	89.38	0	175	2.04	0.97		34	0.917	1	1	1	2	2	53.98	5.67	1
40	0	25	0	158	63	25.24	107	70	37	121.6	111	1	1	2.77	56	130.9	0	198	2.06	1.08	84.29	33.9	0.55	1	2	1	1	1	29.32	3.08	2
41	1	52	1	169	73	25.56	142	86	56	25.01	130	1	1	8.61	251	25.75	1	662	2.358		184.52	41.7	3.1457	1	2	1	2	2	44.81	4.7	2
42	0	46	1	157	52	21.1	106	66	40	88.89	119	1	1	4.34	66	101.1	0	213	2.24	1.22	42.9	35.7	0.187	2	1	1	1	1	63.96	6.71	2
43	0	64	1	150	38	16.89	103	60	43	48.11	74	1	0	5.58	106	50.22	1	218	1.93	0.68	51.45	23.8	1.15	3	2	1	2	2	43.94	4.61	2
44	0	55	1	160	65	25.39	169	99	70	34.56	140	1	1	5.47	145	36.62	1	416	2.31	1.21	57.88	40.9	1.338	1	2	1	1	3	64.16	6.73	2
45	1	51	1	159	67	26.5	130	83	47	72.62	102	1	1	7.08	100	78.97	0	511	2.33	0.85	45.42	38.3	0.928	1	2	1	2	1	49.44	5.19	1
46	0	28	0	158	40	16.02	107	68	39	91.86	112	1	1	5.39	70	106.85	0	284	1.97	1.91	44.71	28.7	2.07	1	2	2	2	1	22.69	2.38	1
47	0	40	0	162	64	24.39	118	59	59	96.49	125	0	1	3.68	63	111.56	0	248	2.294	1.24		39.7	0.08	1	1	1	1	1	64.84	6.81	2
48	1	15	0	165	49	18	117	60	57	171.16	103	1	1	5.3	59	177.51	0	448	2.358	1.85		39.6	0.65	1	2	1	1	1	49.56	5.2	3
49	0	31	0	150	48	21.33	112	80	32	103.5	122	1	0	4.59	62	121.17	0	482	2.17	1.05	62.26	40.3	1.29	1	2	1	1	2	26.7	2.8	2
50	1	43	1	165	55	20.2	125	75	50	52.73	127	1	1	5.74	136	57.58	1	427	2.43			31.6	4.7	1	1	1	1	1	65.09	6.83	2
51	1	18	0	178	74	23.36	123	76	47	114.42	158	1	1	2.74	81	128.48	0	479	2.43			45.9	0.97	1	1	1	1	1			3
52	0	26	0	150	48	21.33	117	71	46	123.17	111	1	1	4.98	55	130.75	0	388	2.26	1.15	48.75	34.9	1.6	1	2	1	1	1	31.77	3.34	2
53	1	26	0	175	105	34.29	160	89	71	149.08	153	1	1	3.68	51	192.55	0	372	2.26	1.09		41.5	0.68	1	2	1	1	1	47.91	5.03	1
54	1	28	0	170	63	21.8	104	61	43	75.86	135	0	1	3.07	107	85.52	0	371	2.4	0.93	86.81	46.5	0.26	1	2	2	1	1	62.32	6.54	1
55	0	35	0	155	50	20.81	103	66	37	97.35	107	0	1	3.12	64	113.37	0	283	2.12	2.88	13.9	37.5	0.189	1	1	1	2	1	73.31	7.7	2
56	0	33	0	163	73	27.48	128	87	41	112.84	123.2	1	1	5.09	65	112.84	0	355	2.35	1.05	40.6	43.4	0.9347	1	1	1	2	1	65.38	6.86	2
57	1	27	0	158	47	18.83	115	67	48	81.69	110	0	1	6.45	98	95.78	0	254	2.273	1.11		41	0.1275	1	1	1	2	1	86.44	9.07	2
58	1	31	0	168	50	17.72	118	70	48	62.69	147	1	1	5.62	80	119.05	0	417	2.34	1.36	37.96	44	0.6074	1	1	1	1	1	39.81	4.18	1
59	0	29	0	156	48	19.72	98	59	39	50.42	113	1	1	6.38	79	91.65	0	281	2.338	1.46		45.1	0.808	2	1	1	2	1	60.55	6.36	1
60	1	38	0	170	67	23.18	129	84	45	61.83	136.1	1	1	5.3	116	72.29	0	523	2.25	1.12		38.8	1.5536	1	1	2	2	2	55.17	5.79	3
61	1	49	1	163	60	22.58	177	94	83	68.1	104.6	1	1	5.97	115	67.62	0	437	2.04	3.19		36.4	2.1333	1	2	1	1	1	76.42	8.02	3
62	0	31	0	156	62	25.48	127	78	49	53.97	126	1	1	3.9	71	102.84	0	248	2.272	1.3	36.98	40	0.7225	1	1	1	2	2	31.63	3.32	2
63	1	27	0	166	70	25.4	137	80	57	53.82	165	1	1	7.69	145	59.62	1	611	2.32	2.17		43.2	2.8872	2	1	1	2	2	16.53	1.74	2
64	1	29	0	172	64	21.63	139	84	55	74.52	120	1	1	3.39	77	113.57	0	339	2.36	1.2		47.4	0.278	1	1	1	2	1			1
65	1	51	1	163	55	20.7	112	59	53	92.62	123	1	1	4.85	79	99.46	0	416	2.29	3.12		40.6	0.533	1	1	1	1	1	70.92	7.44	2
66	0	23	0	160	47	18.36	103	73	30	126.27	120	0	1	4.73	55	133.54	0	273	2.37	3.44		45.2	0.1346	1	1	1	1	1	62.19	6.53	2
67	1	17	0	170	55	19.03	107	58	49	111	123	1	1	5.05	75	113.43	0	505	2.432	1.61		42	0.4813	1	1	1	2	1	59.53	6.25	3
68	1	32	0	160	67	26.17	148	129	19	171.01	118	1	0	9.28	299	23.98	1	566	2.37	1.21		42.5	1.662	1	1	1	1	2	56.43	5.92	2
69	1	35	0	154	53	22.35	138	94	44	68.78	144	1	1	9.86	112	77.04	0	42	1.755	1.53	74.78	14.2	1.1905	1	1	1	1	1	19.11	2.01	2
70	1	19	0	174	66	21.8	118	81	37	138.26	132.9	1	1	5.81	69	129.09	0	408	1.817	1.2		17.7	6.828	1	2	2	2	2	6.79	0.71	2
71	1	35	0	170	72	24.91	131	71	60	114.53	149	1	1	4.16	72	119.3	0	406	2.18	1.27		41	0.51	1	1	1	1	1			3
72	0	32	0	162	64	24.39	115	68	47	90.9	130	1	1	5.55	69	105.71	0	305	2.134	1.24		39	0.15	1	1	1	1	1			1
73	1	20	0	164	67	24.91	135	83	52	132.55	156	1	1	3.67	70	136.53	0	403	2.429	1.62		46	0.1585	1	1	1	1	1	62.02	6.51	2
74	0	40	0	158	55	22.03	150	79	71	51.25	140	1	0	5.6	109	57.47	1	376	2.214	0.98	77.2	40	0.774	1	1	1	2	1			3
75	0	30	0	154	61	25.72	110	70	40	124.87	134	1	1	5.28	53	128.68	0	326	2.33	1.37	32.47	43	0.4486	1	1	1	2	1	79.94	7.55	2
76	0	33	0	157	54	21.91	102	64	38	134.08	120	1	1	3.56	49	129.28	0	179	2.144	0.88	74.23	40	0.5018	1	2	1	2	1	52.73	5.54	2
77	1	45	1	167	72	25.87	158	90	68	85.15	104	1	1	5.2	99	83.37	0	373	2.055	0.78		30.5	1.139	2	1	2	2	2			1
78	1	49	1	180	82	25.31	140	92	48	37.16	163	1	1	7.1	180	39.32	1	464	2.344	1.03	38.1	41	1.7505	1	1	1	2	3	58.65	6.16	2
79	1	15	0	168	54	19.13	136	89	47	189.58	139	1	1	3.52	54	198	0	206	2.193	1.23	43.02	35	1.1024	1	1	1	2	1	13.32	1.4	1
80	1	33	0	165	68	24.98	130	80	50	94.42	146	1	1	4.35	86	107.55	0	518	2.157	1.17	29.43	39	3.554	1	1	1	2	1	72.35	7.59	2
81	1	63	1	162	60.5	23.05	144	78	66	29.47	100.9	1	1	12.82	247	24.3	1	579	1.733	1.12		16.7	3.0867	1	1	2	1	1	15.88	1.67	1
82	0	19	0	157	47	19.07	111	67	44	91.77	127	1	1	4.37	75	104.7	0	295	2.236		11.97	43.1	0.1977	1	1	1	1	1	40.32	4.23	2
83	1	29	0	174	93	30.72	130	72	58	42.98	137	1	1	9.21	174	47.15	1	679	2.11	1.62	57.3	34		1	2	1	2	2	40.34	4.24	3
84	1	44	1	155	64	26.64	120	78	42	11	85	1	1	17.12	531	11	1	565	2.296	1.67	47.88	39.8	1.093	1	2	1	2	1	42.9	4.5	2
85	0	26	0	160	53	20.7	147	92	55	61.08	95	1	0	4.23	101	69.54	0	473	2.195	1.48	55.76	34.9	2.0714	1	1	1	2	2	20.24	2.13	2
86	1	57	1	170	63	21.8	149	84	65	105.87	118	1	1	3.52	68	117.31	0	417	2.229	1.35		37.6	0.4261	1	2	1	1	1	39.95	4.19	1
87	1	45	1	182	89	26.87	103	72	31	41.51	141	1	1	7.84	166	44.61	1	574	2.2	1.56		39.8	2.9384	1	2	1	1	3	14.34	1.51	2
88	1	38	0	177	78	24.9	137	90	47	71.3	152	1	1	5.27	107	79.72	0	375	2.189	1.34	69.2	40.1	1.432	1	1	1	2	1	53.79	5.65	3
89	1	30	0	173	80	26.73	138	92	46	53.97	176	1	1	8.42	142	59.87	1	559	2.109	1.08	72.56	37.4	5.59	1	1	1	2	1	19.97	2.1	2
90	1	27	0	166	58	21.05	121	67	54	116.97	133	1	1	5	74	120.81	0	326	2.274	1.15	33.66	40	1.12	1	2	1	1	1	35.67	3.74	3
91	0	36	0	156	67	27.53	106	68	38	85.87	134	1	1	4.35	71	99.29	0	313	2.082	1.02	48.33	36.9	1.28	1	1	1	1	2	23.56	2.47	1
92	1	30	0	165	54.5	20.02	125	72	53	67.1	122	1	1	7.71	135	63.65	0	436	2.331	0.9	48.85	37.3	0.4388	1	1	1	2	1	95.21	9.99	1
93	1	31	0	170	62.5	21.63	154	88	66	45.85	100	1	1	8.54	176	45.85	1	463	2.003	1.53	62.69	27.1	5.1238	1	1	1	2	2	17.86	1.87	2
94	1	45	1	172	76	25.69	144	80	64	49.7	102	1	1	11.42	142	53.89	1	502	2.22	1.14		37	2.415	1	1	1	2	2	43.01	4.51	1
95	0	28	0	161	58	22.38	119	78	41	141.97	130	1	1	4.84	48	134.81	0	344	2.22	1.69		36	0.73	1	1	1	2	1	53.38	5.6	2
96	1	51	1	166	62	22.5	123	78	45	136.17	128	1	1	4.82	58	145.62	0	279	1.98	0.95		28	5.116	1	1	1	1	1	46.84	4.92	2
97	0	33	0	162	59	22.48	102	53	49	98.52	116	1	1	5.13	64	114.97	0	241	2.26			39	0.35	1	2	1	1	1	35.87	3.77	3
98	1	26	0	171	64	21.89	128	93	35	92.84	120	1	1	4.56	91	105.5	0	294	2.32	1.03		45	0.79	1	1	1	2	1	50.6	5.31	3
99	0	47	1	161	55	21.22	134	89	45	78.78	142	1	1	4.31	73	88.87	0	192	2.25	1.71		43	0.53	1	1	1	2	2	46.12	4.84	2
100	1	37	0	160	74	28.91	156	97	59	36.73	120	1	1	9.14	191	39.82	1	384	2.09	2.01		34	3.3	2	1	1	1	2	19.72	2.07	1
101	0	37	0	150	46	20.44	122	81	41	73.35	111	1	1	7.22	81	84.06	0	393	1.89	1.06		27	3.74	2	2	1	2	1	7.68	0.81	2
102	1	40	0	170	69	23.88	147	92	55	58.44	141	1	1	5.45	126	64.5	0	555	2.24	1.11		40	0.441	2	1	1	2	1	52.04	5.46	2
103	1	23	0	173	66	22.05	154	98	56	7.07	66	1	1	15.79	864	7.07	1	412	2.15	1.68	107	30.4	5.42	3	2	1	1	3	39.41	4.14	3
104	1	40	0	170	71	24.57	120	74	46	49.69	127	1	1	5.91	145	54.42	1	482	2.31	1		42	0.506	1	1	1	2	2	41.18	4.32	2
105	1	38	0	165	65	23.88	120	60	60	62.47	131	0	1	5.95	120	69.39	0	472	2.188	0.76		41.3	0.287	1	1	1	1	1	54.78	5.75	3
106	0	26	0	154	53	22.35	115	67	48	132.35	130	0	0	2.82	54	131.54	0	268	2.097	1.19	36.14	36.9	0.7593	1	2	2	1	1	26.39	2.77	2
107	0	28	0	157	42	17.04	141	91	50	48.38	109	1	1	6.58	122	54.56	1	425	2.153	1.3	46	40	2.329	1	2	1	2	1	45.58	4.78	3
108	1	69	1	162	65	24.77	176	98	78	68.3	88	1	1	10.75	100	69.59	0	403	1.79	1.12		17.5	8.648	1	1	1	2	1	6.79	0.71	1
109	0	37	0	150	45	20	151	98	53	77.76	125	1	1	5.03	77	89.38	0	175	2.04	0.97		34	0.917	1	1	1	2	2	53.98	5.67	1
110	0	25	0	158	63	25.24	107	70	37	121.6	111	1	1	2.77	56	130.9	0	198	2.06	1.08	84.29	33.9	0.55	1	2	1	1	1	29.32	3.08	2
111	1	52	1	169	73	25.56	142	86	56	25.01	130	1	1	8.61	251	25.75	1	662	2.358		184.52	41.7	3.1457	1	2	1	2	2	44.81	4.7	2
112	0	46	1	157	52	21.1	106	66	40	88.89	119	1	1	4.34	66	101.1	0	213	2.24	1.22	42.9	35.7	0.187	2	1	1	1	1	63.96	6.71	2
113	0	64	1	150	38	16.89	103	60	43	48.11	74	1	0	5.58	106	50.22	1	218	1.93	0.68	51.45	23.8	1.15	3	2	1	2	2	43.94	4.61	2
114	0	55	1	160	65	25.39	169	99	70	34.56	140	1	1	5.47	145	36.62	1	416	2.31	1.21	57.88	40.9	1.338	1	2	1	1	3	64.16	6.73	2
115	1	51	1	159	67	26.5	130	83	47	72.62	102	1	1	7.08	100	78.97	0	511	2.33	0.85	45.42	38.3	0.928	1	2	1	2	1	49.44	5.19	1
116	0	28	0	158	40	16.02	107	68	39	91.86	112	1	1	5.39	70	106.85	0	284	1.97	1.91	44.71	28.7	2.07	1	2	2	2	1	22.69	2.38	1
117	0	40	0	162	64	24.39	118	59	59	96.49	125	0	1	3.68	63	111.56	0	248	2.294	1.24		39.7	0.08	1	1	1	1	1	64.84	6.81	2
118	1	15	0	165	49	18	117	60	57	171.16	103	1	1	5.3	59	177.51	0	448	2.358	1.85		39.6	0.65	1	2	1	1	1	49.56	5.2	3
119	0	31	0	150	48	21.33	112	80	32	103.5	122	1	0	4.59	62	121.17	0	482	2.17	1.05	62.26	40.3	1.29	1	2	1	1	2	26.7	2.8	2
120	1	43	1	165	55	20.2	125	75	50	52.73	127	1	1	5.74	136	57.58	1	427	2.43			31.6	4.7	1	1	1	1	1	65.09	6.83	2
121	1	18	0	178	74	23.36	123	76	47	114.42	158	1	1	2.74	81	128.48	0	479	2.43			45.9	0.97	1	1	1	1	1			3
122	0	26	0	150	48	21.33	117	71	46	123.17	111	1	1	4.98	55	130.75	0	388	2.26	1.15	48.75	34.9	1.6	1	2	1	1	1	31.77	3.34	2
123	1	26	0	175	105	34.29	160	89	71	149.08	153	1	1	3.68	51	192.55	0	372	2.26	1.09		41.5	0.68	1	2	1	1	1	47.91	5.03	1
124	1	28	0	170	63	21.8	104	61	43	75.86	135	0	1	3.07	107	85.52	0	371	2.4	0.93	86.81	46.5	0.26	1	2	2	1	1	62.32	6.54	1
125	0	35	0	155	50	20.81	103	66	37	97.35	107	0	1	3.12	64	113.37	0	283	2.12	2.88	13.9	37.5	0.189	1	1	1	2	1	73.31	7.7	2
126	0	33	0	163	73	27.48	128	87	41	112.84	123.2	1	1	5.09	65	112.84	0	355	2.35	1.05	40.6	43.4	0.9347	1	1	1	2	1	65.38	6.86	2
127	1	27	0	158	47	18.83	115	67	48	81.69	110	0	1	6.45	98	95.78	0	254	2.273	1.11		41	0.1275	1	1	1	2	1	86.44	9.07	2
128	1	31	0	168	50	17.72	118	70	48	62.69	147	1	1	5.62	80	119.05	0	417	2.34	1.36	37.96	44	0.6074	1	1	1	1	1	39.81	4.18	1
129	0	29	0	156	48	19.72	98	59	39	50.42	113	1	1	6.38	79	91.65	0	281	2.338	1.46		45.1	0.808	2	1	1	2	1	60.55	6.36	1
130	1	38	0	170	67	23.18	129	84	45	61.83	136.1	1	1	5.3	116	72.29	0	523	2.25	1.12		38.8	1.5536	1	1	2	2	2	55.17	5.79	3
131	1	49	1	163	60	22.58	177	94	83	68.1	104.6	1	1	5.97	115	67.62	0	437	2.04	3.19		36.4	2.1333	1	2	1	1	1	76.42	8.02	3
132	0	31	0	156	62	25.48	127	78	49	53.97	126	1	1	3.9	71	102.84	0	248	2.272	1.3	36.98	40	0.7225	1	1	1	2	2	31.63	3.32	2
133	1	27	0	166	70	25.4	137	80	57	53.82	165	1	1	7.69	145	59.62	1	611	2.32	2.17		43.2	2.8872	2	1	1	2	2	16.53	1.74	2
134	1	29	0	172	64	21.63	139	84	55	74.52	120	1	1	3.39	77	113.57	0	339	2.36	1.2		47.4	0.278	1	1	1	2	1			1
135	1	51	1	163	55	20.7	112	59	53	92.62	123	1	1	4.85	79	99.46	0	416	2.29	3.12		40.6	0.533	1	1	1	1	1	70.92	7.44	2
136	0	23	0	160	47	18.36	103	73	30	126.27	120	0	1	4.73	55	133.54	0	273	2.37	3.44		45.2	0.1346	1	1	1	1	1	62.19	6.53	2
137	1	17	0	170	55	19.03	107	58	49	111	123	1	1	5.05	75	129.09	0	505	2.432	1.61		42	0.4813	1	1	1	2	1	59.53	6.25	3
138	1	32	0	160	67	26.17	148	129	19	171.01	118	1	0	9.28	299	23.98	1	566	2.37	1.21		42.5	1.662	1	1	1	1	2	56.43	5.92	2
139	1	35	0	154	53	22.35	138	94	44	68.78	144	1	1	9.86	112	77.04	0	42	1.755	1.53	74.78	14.2	1.1905	1	1	1	1	1	19.11	2.01	2
140	1	19	0	174	66	21.8	118	81	37	138.26	132.9	1	1	5.81	69	140.26	0	408	1.817	1.2		17.7	6.828	1	2	2	2	2	6.79	0.71	2
141	1	35	0	170	72	24.91	131	71	60	114.53	149	1	1	4.16	72	119.3	0	406	2.18	1.27		41	0.51	1	1	1	1	1			3
142	0	32	0	162	64	24.39	115	68	47	90.9	130	1	1	5.55	69	105.71	0	305	2.134	1.24		39	0.15	1	1	1	1	1			1
143	1	20	0	164	67	24.91	135	83	52	132.55	156	1	1	3.67	70	136.53	0	403	2.429	1.62		46	0.1585	1	1	1	1	1	62.02	6.51	2
144	0	40	0	158	55	22.03	150	79	71	51.25	140	1	0	5.6	109	57.47	1	376	2.214	0.98	77.2	40	0.774	1	1	1	2	1			3
145	0	30	0	154	61	25.72	110	70	40	124.87	134	1	1	5.28	53	128.68	0	326	2.33	1.37	32.47	43	0.4486	1	1	1	2	1	79.94	7.55	2
146	0	33	0	157	54	21.91	102	64	38	134.08	120	1	1	3.56	49	129.28	0	179	2.144	0.88	74.23	40	0.5018	1	2	1	2	1	52.73	5.54	2
147	1	45	1	167	72	25.87	158	90	68	85.15	104	1	1	5.2	99	83.37	0	373	2.055	0.78		30.5	1.139	2	1	2	2	2			1
148	1	49	1	180	82	25.31	140	92	48	37.16	163	1	1	7.1	180	39.32	1	464	2.344	1.03	38.1	41	1.7505	1	1	1	2	3	58.65	6.16	2
149	1	15	0	168	54	19.13	136	89	47	189.58	139	1	1	3.52	54	198	0	206	2.193	1.23	43.02	35	1.1024	1	1	1	2	1	13.32	1.4	1
150	1	33	0	165	68	24.98	130	80	50	94.42	146	1	1	4.35	86	107.55	0	518	2.157	1.17	29.43	39	3.554	1	1	1	2	1	72.35	7.59	2
151	1	63	1	162	60.5	23.05	144	78	66	29.47	100.9	1	1	12.82	247	24.3	1	579	1.733	1.12		16.7	3.0867	1	1	2	1	1	15.88	1.67	1
152	0	19	0	157	47	19.07	111	67	44	91.77	127	1	1	4.37	75	104.7	0	295	2.236		11.97	43.1	0.1977	1	1	1	1	1	40.32	4.23	2
153	1	29	0	174	93	30.72	130	72	58	42.98	137	1	1	9.21	174	47.15	1	679	2.11	1.62	57.3	34		1	2	1	2	2	40.34	4.24	3
154	1	44	1	155	64	26.64	120	78	42	11	85	1	1	17.12	531	11	1	565	2.296	1.67	47.88	39.8	1.093	1	2	1	2	1	42.9	4.5	2
155	0	26	0	160	53	20.7	147	92	55	61.08	95	1	0	4.23	101	69.54	0	473	2.195	1.48	55.76	34.9	2.0714	1	1	1	2	2	20.24	2.13	2
156	1	57	1	170	63	21.8	149	84	65	105.87	118	1	1	3.52	68	117.31	0	417	2.229	1.35		37.6	0.4261	1	2	1	1	1	39.95	4.19	1
157	1	45	1	182	89	26.87	103	72	31	41.51	141	1	1	7.84	166	44.61	1	574	2.2	1.56		39.8	2.9384	1	2	1	1	3	14.34	1.51	2
158	1	38	0	177	78	24.9	137	90	47	71.3	152	1	1	5.27	107	79.72	0	375	2.189	1.34	69.2	40.1	1.432	1	1	1	2	1	53.79	5.65	3
159	1	30	0	173	80	26.73	138	92	46	53.97	176	1	1	8.42	142	59.87	1	559	2.109	1.08	72.56	37.4	5.59	1	1	1	2	1	19.97	2.1	2
160	1	27	0	166	58	21.05	121	67	54	116.97	133	1	1	5	74	120.81	0	326	2.274	1.15	33.66	40	1.12	1	2	1	1	1	35.67	3.74	3
161	0	36	0	156	67	27.53	106	68	38	85.87	134	1	1	4.35	71	99.29	0	313	2.082	1.02	48.33	36.9	1.28	1	1	1	1	2	23.56	2.47	1
162	1	30	0	165	54.5	20.02	125	72	53	67.1	122	1	1	7.71	135	63.65	0	436	2.331	0.9	48.85	37.3	0.4388	1	1	1	2	1	95.21	9.99	1
163	1	31	0	170	62.5	21.63	154	88	66	45.85	100	1	1	8.54	176	45.85	1	463	2.003	1.53	62.69	27.1	5.1238	1	1	1	2	2	17.86	1.87	2
164	1	45	1	172	76	25.69	144	80	64	49.7	102	1	1	11.42	142	53.89	1	502	2.22	1.14		37	2.415	1	1	1	2	2	43.01	4.51	1
165	0	28	0	161	58	22.38	119	78	41	141.97	130	1	1	4.84	48	134.81	0	344	2.22	1.69		36	0.73	1	1	1	2	1	53.38	5.6	2
166	1	51	1	166	62	22.5	123	78	45	136.17	128	1	1	4.82	58	145.62	0	279	1.98	0.95		28	5.116	1	1	1	1	1	46.84	4.92	2
167	0	33	0	162	59	22.48	102	53	49	98.52	116	1	1	5.13	64	114.97	0	241	2.26			39	0.35	1	2	1	1	1	35.87	3.77	3
168	1	26	0	171	64	21.89	128	93	35	92.84	120	1	1	4.56	91	105.5	0	294	2.32	1.03		45	0.79	1	1	1	2	1	50.6	5.31	3
169	0	47	1	161	55	21.22	134	89	45	78.78	142	1	1	4.31	73	88.87	0	192	2.25	1.71		43	0.53	1	1	1	2	2	46.12	4.84	2
170	1	37	0	160	74	28.91	156	97	59	36.73	120	1	1	9.14	191	39.82	1	384	2.09	2.01		34	3.3	2	1	1	1	2	19.72	2.07	1
171	0	37	0	150	46	20.44	122	81	41	73.35	111	1	1	7.22	81	84.06	0	393	1.89	1.06		27	3.74	2	2	1	2	1	7.68	0.81	2
172	1	40	0	170	69	23.88	147	92	55	58.44	141	1	1	5.45	126	64.5	0	555	2.24	1.11		40	0.441	2	1	1	2	1	52.04	5.46	2
173	1	23	0	173	66	22.05	154	98	56	7.07	66	1	1	15.79	864	7.07	1	412	2.15	1.68	107	30.4	5.42	3	2	1	1	3	39.41	4.14	3
174	1	40	0	170	71	24.57	120	74	46	49.69	127	1	1	5.91	145	54.42	1	482	2.31	1		42	0.506	1	1	1	2	2	41.18	4.32	2
175	1	38	0	165	65	23.88	120	60	60	62.47	131	0	1	5.95	120	69.39	0	472	2.188	0.76		41.3	0.287	1	1	1	1	1	54.78	5.75	3
176	0	26	0	154	53	22.35	115	67	48	132.35	130	0	0	2.82	54	131.54	0	268	2.097	1.19	36.14	36.9	0.7593	1	2	2	1	1	26.39	2.77	2
177	0	28	0	157	42	17.04	141	91	50	48.38	109	1	1	6.58	122	54.56	1	425	2.153	1.3	46	40	2.329	1	2	1	2	1	45.58	4.78	3
178	1	69	1	162	65	24.77	176	98	78	68.3	88	1	1	10.75	100	69.59	0	403	1.79	1.12		17.5	8.648	1	1	1	2	1	6.79	0.71	1
179	0	37	0	150	45	20	151	98	53	77.76	125	1	1	5.03	77	89.38	0	175	2.04	0.97		34	0.917	1	1	1	2	2	53.98	5.67	1
180	0	25	0	158	63	25.24	107	70	37	121.6	111	1	1	2.77	56	130.9	0	198	2.06	1.08	84.29	33.9	0.55	1	2	1	1	1	29.32	3.08	2
181	1	52	1	169	73	25.56	142	86	56	25.01	130	1	1	8.61	251	25.75	1	662	2.358		184.52	41.7	3.1457	1	2	1	2	2	44.81	4.7	2
182	0	46	1	157	52	21.1	106	66	40	88.89	119	1	1	4.34	66	101.1	0	213	2.24	1.22	42.9	35.7	0.187	2	1	1	1	1	63.96	6.71	2
183	0	64	1	150	38	16.89	103	60	43	48.11	74	1	0	5.58	106	50.22	1	218	1.93	0.68	51.45	23.8	1.15	3	2	1	2	2	43.94	4.61	2
184	0	55	1	160	65	25.39	169	99	70	34.56	140	1	1	5.47	145	36.62	1	416	2.31	1.21	57.88	40.9	1.338	1	2	1	1	3	64.16	6.73	2
185	1	51	1	159	67	26.5	130	83	47	72.62	102	1	1	7.08	100	78.97	0	511	2.33	0.85	45.42	38.3	0.928	1	2	1	2	1	49.44	5.19	1
186	0	28	0	158	40	16.02	107	68	39	91.86	112	1	1	5.39	70	106.85	0	284	1.97	1.91	44.71	28.7	2.07	1	2	2	2	1	22.69	2.38	1
187	0	40	0	162	64	24.39	118	59	59	96.49	125	0	1	3.68	63	111.56	0	248	2.294	1.24		39.7	0.08	1	1	1	1	1	64.84	6.81	2
188	1	15	0	165	49	18	117	60	57	171.16	103	1	1	5.3	59	177.51	0	448	2.358	1.85		39.6	0.65	1	2	1	1	1	49.56	5.2	3
189	0	31	0	150	48	21.33	112	80	32	103.5	122	1	0	4.59	62	121.17	0	482	2.17	1.05	62.26	40.3	1.29	1	2	1	1	2	26.7	2.8	2
190	1	43	1	165	55	20.2	125	75	50	52.73	127	1	1	5.74	136	57.58	1	427	2.43			31.6	4.7	1	1	1	1	1	65.09	6.83	2
191	1	18	0	178	74	23.36	123	76	47	114.42	158	1	1	2.74	81	128.48	0	479	2.43			45.9	0.97	1	1	1	1	1			3
192	0	26	0	150	48	21.33	117	71	46	123.17	111	1	1	4.98	55	130.75	0	388	2.26	1.15	48.75	34.9	1.6	1	2	1	1	1	31.77	3.34	2
193	1	26	0	175	105	34.29	160	89	71	149.08	153	1	1	3.68	51	192.55	0	372	2.26	1.09		41.5	0.68	1	2	1	1	1	47.91	5.03	1
194	1	28	0	170	63	21.8	104	61	43	75.86	135	0	1	3.07	107	85.52	0	371	2.4	0.93	86.81	46.5	0.26	1	2	2	1	1	62.32	6.54	1
195	0	35	0	155	50	20.81	103	66	37	97.35	107	0	1	3.12	64	113.37	0	283	2.12	2.88	13.9	37.5	0.189	1	1	1	2	1	73.31	7.7	2
196	0	33	0	163	73	27.48	128	87	41	112.84	123.2	1	1	5.09	65	112.84	0	355	2.35	1.05	40.6	43.4	0.9347	1	1	1	2	1	65.38	6.86	2
197	1	27	0	158	47	18.83	115	67	48	81.69	110	0	1	6.45	98	95.78	0	254	2.273	1.11		41	0.1275	1	1	1	2	1	86.44	9.07	2
198	1	31	0	168	50	17.72	118	70	48	62.69	147	1	1	5.62	80	119.05	0	417	2.34	1.36	37.96	44	0.6074	1	1	1	1	1	39.81	4.18	1
199	0	29	0	156	48	19.72	98	59	39	50.42	113	1	1	6.38	79	91.65	0	281	2.338	1.46		45.1	0.808	2	1	1	2	1	60.55	6.36	1
200	1	38	0	170	67	23.18	129	84	45	61.83	136.1	1	1	5.3	116	72.29	0	523	2.25	1.12		38.8	1.5536	1	1	2	2	2	55.17	5.79	3
201	1	49	1	163	60	22.58	177	94	83	68.1	104.6	1	1	5.97	115	67.62	0	437	2.04	3.19		36.4	2.1333	1	2	1	1	1	76.42	8.02	3
202	0	31	0	156	62	25.48	127	78	49	53.97	126	1	1	3.9	71	102.84	0	248	2.272	1.3	36.98	40	0.7225	1	1	1	2	2	31.63	3.32	2
203	1	27	0	166	70	25.4	137	80	57	53.82	165	1	1	7.69	145	59.62	1	611	2.32	2.17		43.2	2.8872	2	1	1	2	2	16.53	1.74	2
204	1	29	0	172	64	21.63	139	84	55	74.52	120	1	1	3.39	77	113.57	0	339	2.36	1.2		47.4	0.278	1	1	1	2	1			1
205	1	51	1	163	55	20.7	112	59	53	92.62	123	1	1	4.85	79	99.46	0	416	2.29	3.12		40.6	0.533	1	1	1	1	1	70.92	7.44	2
206	0	23	0	160	47	18.36	103	73	30	126.27	120	0	1	4.73	55	133.54	0	273	2.37	3.44		45.2	0.1346	1	1	1	1	1	62.19	6.53	2
207	1	17	0	170	55	19.03	107	58	49	111	123	1	1	5.05	75	129.09	0	505	2.432	1.61		42	0.4813	1	1	1	2	1	59.53	6.25	3
208	1	32	0	160	67	26.17	148	129	19	171.01	118	1	0	9.28	299	23.98	1	566	2.37	1.21		42.5	1.662	1	1	1	1	2	56.43	5.92	2
209	1	35	0	154	53	22.35	138	94	44	68.78	144	1	1	9.86	112	77.04	0	42	1.755	1.53	74.78	14.2	1.1905	1	1	1	1	1	19.11	2.01	2
210	1	19	0	174	66	21.8	118	81	37	138.26	132.9	1	1	5.81	69	140.26	0	408	1.817	1.2		17.7	6.828	1	2	2	2	2	6.79	0.71	2
211	0	40	0	158	55	22.03	150	79	71	51.25	140	1	0	5.6	109	57.47	1	376	2.214	0.98	77.2	40	0.774	1	1	1	2	1			3
212	0	26	0	160	53	20.7	147	92	55	61.08	95	1	0	4.23	101	69.54	0	473	2.195	1.48	55.76	34.9	2.0714	1	1	1	2	2	20.24	2.13	2
213	0	28	0	157	42	17.04	141	91	50	48.38	109	1	1	6.58	122	54.56	1	425	2.153	1.3	46	40	2.329	1	2	1	2	1	45.58	4.78	3
214	0	40	0	158	55	22.03	150	79	71	51.25	140	1	0	5.6	109	57.47	1	376	2.214	0.98	77.2	40	0.774	1	1	1	2	1			3
215	0	26	0	160	53	20.7	147	92	55	61.08	95	1	0	4.23	101	69.54	0	473	2.195	1.48	55.76	34.9	2.0714	1	1	1	2	2	20.24	2.13	2
216	0	28	0	157	42	17.04	141	91	50	48.38	109	1	1	6.58	122	54.56	1	425	2.153	1.3	46	40	2.329	1	2	1	2	1	45.58	4.78	3
217	0	40	0	158	55	22.03	150	79	71	51.25	140	1	0	5.6	109	57.47	1	376	2.214	0.98	77.2	40	0.774	1	1	1	2	1			3
218	0	26	0	160	53	20.7	147	92	55	61.08	95	1	0	4.23	101	69.54	0	473	2.195	1.48	55.76	34.9	2.0714	1	1	1	2	2	20.24	2.13	2
219	0	28	0	157	42	17.04	141	91	50	48.38	109	1	1	6.58	122	54.56	1	425	2.153	1.3	46	40	2.329	1	2	1	2	1	45.58	4.78	3
220	0	40	0	158	55	22.03	150	79	71	51.25	140	1	0	5.6	109	57.47	1	376	2.214	0.98	77.2	40	0.774	1	1	1	2	1			3
221	0	26	0	160	53	20.7	147	92	55	61.08	95	1	0	4.23	101	69.54	0	473	2.195	1.48	55.76	34.9	2.0714	1	1	1	2	2	20.24	2.13	2
222	0	28	0	157	42	17.04	141	91	50	48.38	109	1	1	6.58	122	54.56	1	425	2.153	1.3	46	40	2.329	1	2	1	2	1	45.58	4.78	3
223	0	40	0	158	55	22.03	150	79	71	51.25	140	1	0	5.6	109	57.47	1	376	2.214	0.98	77.2	40	0.774	1	1	1	2	1			3
224	0	26	0	160	53	20.7	147	92	55	61.08	95	1	0	4.23	101	69.54	0	473	2.195	1.48	55.76	34.9	2.0714	1	1	1	2	2	20.24	2.13	2
225	0	28	0	157	42	17.04	141	91	50	48.38	109	1	1	6.58	122	54.56	1	425	2.153	1.3	46	40	2.329	1	2	1	2	1	45.58	4.78	3
226	0	40	0	158	55	22.03	150	79	71	51.25	140	1	0	5.6	109	57.47	1	376	2.214	0.98	77.2	40	0.774	1	1	1	2	1			3
227	0	26	0	160	53	20.7	147	92	55	61.08	95	1	0	4.23	101	69.54	0	473	2.195	1.48	55.76	34.9	2.0714	1	1	1	2	2	20.24	2.13	2
228	0	28	0	157	42	17.04	141	91	50	48.38	109	1	1	6.58	122	54.56	1	425	2.153	1.3	46	40	2.329	1	2	1	2	1	45.58	4.78	3
229	0	40	0	158	55	22.03	150	79	71	51.25	140	1	0	5.6	109	57.47	1	376	2.214	0.98	77.2	40	0.774	1	1	1	2	1			3
230	0	26	0	160	53	20.7	147	92	55	61.08	95	1	0	4.23	101	69.54	0	473	2.195	1.48	55.76	34.9	2.0714	1	1	1	2	2	20.24	2.13	2
231	0	28	0	157	42	17.04	141	91	50	48.38	109	1	1	6.58	122	54.56	1	425	2.153	1.3	46	40	2.329	1	2	1	2	1	45.58	4.78	3
232	0	40	0	158	55	22.03	150	79	71	51.25	140	1	0	5.6	109	57.47	1	376	2.214	0.98	77.2	40	0.774	1	1	1	2	1			3
233	0	26	0	160	53	20.7	147	92	55	61.08	95	1	0	4.23	101	69.54	0	473	2.195	1.48	55.76	34.9	2.0714	1	1	1	2	2	20.24	2.13	2
234	0	28	0	157	42	17.04	141	91	50	48.38	109	1	1	6.58	122	54.56	1	425	2.153	1.3	46	40	2.329	1	2	1	2	1	45.58	4.78	3
235	0	40	0	158	55	22.03	150	79	71	51.25	140	1	0	5.6	109	57.47	1	376	2.214	0.98	77.2	40	0.774	1	1	1	2	1			3
236	0	26	0	160	53	20.7	147	92	55	61.08	95	1	0	4.23	101	69.54	0	473	2.195	1.48	55.76	34.9	2.0714	1	1	1	2	2	20.24	2.13	2
237	0	28	0	157	42	17.04	141	91	50	48.38	109	1	1	6.58	122	54.56	1	425	2.153	1.3	46	40	2.329	1	2	1	2	1	45.58	4.78	3
238	0	40	0	158	55	22.03	150	79	71	51.25	140	1	0	5.6	109	57.47	1	376	2.214	0.98	77.2	40	0.774	1	1	1	2	1			3
239	0	26	0	160	53	20.7	147	92	55	61.08	95	1	0	4.23	101	69.54	0	473	2.195	1.48	55.76	34.9	2.0714	1	1	1	2	2	20.24	2.13	2
240	0	28	0	157	42	17.04	141	91	50	48.38	109	1	1	6.58	122	54.56	1	425	2.153	1.3	46	40	2.329	1	2	1	2	1	45.58	4.78	3
241	0	40	0	158	55	22.03	150	79	71	51.25	140	1	0	5.6	109	57.47	1	376	2.214	0.98	77.2	40	0.774	1	1	1	2	1			3
242	0	26	0	160	53	20.7	147	92	55	61.08	95	1	0	4.23	101	69.54	0	473	2.195	1.48	55.76	34.9	2.0714	1	1	1	2	2	20.24	2.13	2
243	0	28	0	157	42	17.04	141	91	50	48.38	109	1	1	6.58	122	54.56	1	425	2.153	1.3	46	40	2.329	1	2	1	2	1	45.58	4.78	3
244	0	40	0	158	55	22.03	150	79	71	51.25	140	1	0	5.6	109	57.47	1	376	2.214	0.98	77.2	40	0.774	1	1	1	2	1			3
245	0	26	0	160	53	20.7	147	92	55	61.08	95	1	0	4.23	101	69.54	0	473	2.195	1.48	55.76	34.9	2.0714	1	1	1	2	2	20.24	2.13	2
246	0	28	0	157	42	17.04	141	91	50	48.38	109	1	1	6.58	122	54.56	1	425	2.153	1.3	46	40	2.329	1	2	1	2	1	45.58	4.78	3
247	0	26	0	160	53	20.7	147	92	55	61.08	95	1	0	4.23	101	69.54	0	473	2.195	1.48	55.76	34.9	2.0714	1	1	1	2	2	20.24	2.13	2
248	0	28	0	157	42	17.04	141	91	50	48.38	109	1	1	6.58	122	54.56	1	425	2.153	1.3	46	40	2.329	1	2	1	2	1	45.58	4.78	3
249	0	26	0	160	53	20.7	147	92	55	61.08	95	1	0	4.23	101	69.54	0	473	2.195	1.48	55.76	34.9	2.0714	1	1	1	2	2	20.24	2.13	2
250	0	28	0	157	42	17.04	141	91	50	48.38	109	1	1	6.58	122	54.56	1	425	2.153	1.3	46	40	2.329	1	2	1	2	1	45.58	4.78	3
251	0	26	0	160	53	20.7	147	92	55	61.08	95	1	0	4.23	101	69.54	0	473	2.195	1.48	55.76	34.9	2.0714	1	1	1	2	2	20.24	2.13	2
252	0	28	0	157	42	17.04	141	91	50	48.38	109	1	1	6.58	122	54.56	1	425	2.153	1.3	46	40	2.329	1	2	1	2	1	45.58	4.78	3
253	0	26	0	160	53	20.7	147	92	55	61.08	95	1	0	4.23	101	69.54	0	473	2.195	1.48	55.76	34.9	2.0714	1	1	1	2	2	20.24	2.13	2
254	0	28	0	157	42	17.04	141	91	50	48.38	109	1	1	6.58	122	54.56	1	425	2.153	1.3	46	40	2.329	1	2	1	2	1	45.58	4.78	3
255	0	26	0	160	53	20.7	147	92	55	61.08	95	1	0	4.23	101	69.54	0	473	2.195	1.48	55.76	34.9	2.0714	1	1	1	2	2	20.24	2.13	2
256	0	28	0	157	42	17.04	141	91	50	48.38	109	1	1	6.58	122	54.56	1	425	2.153	1.3	46	40	2.329	1	2	1	2	1	45.58	4.78	3
257	0	26	0	160	53	20.7	147	92	55	61.08	95	1	0	4.23	101	69.54	0	473	2.195	1.48	55.76	34.9	2.0714	1	1	1	2	2	20.24	2.13	2
258	0	28	0	157	42	17.04	141	91	50	48.38	109	1	1	6.58	122	54.56	1	425	2.153	1.3	46	40	2.329	1	2	1	2	1	45.58	4.78	3
259	0	26	0	160	53	20.7	147	92	55	61.08	95	1	0	4.23	101	69.54	0	473	2.195	1.48	55.76	34.9	2.0714	1	1	1	2	2	20.24	2.13	2
260	0	28	0	157	42	17.04	141	91	50	48.38	109	1	1	6.58	122	54.56	1	425	2.153	1.3	46	40	2.329	1	2	1	2	1	45.58	4.78	3
261	0	26	0	160	53	20.7	147	92	55	61.08	95	1	0	4.23	101	69.54	0	473	2.195	1.48	55.76	34.9	2.0714	1	1	1	2	2	20.24	2.13	2
262	0	28	0	157	42	17.04	141	91	50	48.38	109	1	1	6.58	122	54.56	1	425	2.153	1.3	46	40	2.329	1	2	1	2	1	45.58	4.78	3
263	0	26	0	160	53	20.7	147	92	55	61.08	95	1	0	4.23	101	69.54	0	473	2.195	1.48	55.76	34.9	2.0714	1	1	1	2	2	20.24	2.13	2
264	0	26	0	160	53	20.7	147	92	55	61.08	95	1	0	4.23	101	69.54	0	473	2.195	1.48	55.76	34.9	2.0714	1	1	1	2	2	20.24	2.13	2
265	0	28	0	157	42	17.04	141	91	50	48.38	109	1	1	6.58	122	54.56	1	425	2.153	1.3	46	40	2.329	1	2	1	2	1	45.58	4.78	3
266	0	26	0	160	53	20.7	147	92	55	61.08	95	1	0	4.23	101	69.54	0	473	2.195	1.48	55.76	34.9	2.0714	1	1	1	2	2	20.24	2.13	2
267	0	28	0	157	42	17.04	141	91	50	48.38	109	1	1	6.58	122	54.56	1	425	2.153	1.3	46	40	2.329	1	2	1	2	1	45.58	4.78	3
268	0	26	0	160	53	20.7	147	92	55	61.08	95	1	0	4.23	101	69.54	0	473	2.195	1.48	55.76	34.9	2.0714	1	1	1	2	2	20.24	2.13	2
269	0	28	0	157	42	17.04	141	91	50	48.38	109	1	1	6.58	122	54.56	1	425	2.153	1.3	46	40	2.329	1	2	1	2	1	45.58	4.78	3
270	0	26	0	160	53	20.7	147	92	55	61.08	95	1	0	4.23	101	69.54	0	473	2.195	1.48	55.76	34.9	2.0714	1	1	1	2	2	20.24	2.13	2
271	0	28	0	157	42	17.04	141	91	50	48.38	109	1	1	6.58	122	54.56	1	425	2.153	1.3	46	40	2.329	1	2	1	2	1	45.58	4.78	3
272	0	26	0	160	53	20.7	147	92	55	61.08	95	1	0	4.23	101	69.54	0	473	2.195	1.48	55.76	34.9	2.0714	1	1	1	2	2	20.24	2.13	2
273	0	28	0	157	42	17.04	141	91	50	48.38	109	1	1	6.58	122	54.56	1	425	2.153	1.3	46	40	2.329	1	2	1	2	1	45.58	4.78	3
274	0	26	0	160	53	20.7	147	92	55	61.08	95	1	0	4.23	101	69.54	0	473	2.195	1.48	55.76	34.9	2.0714	1	1	1	2	2	20.24	2.13	2
275	0	28	0	157	42	17.04	141	91	50	48.38	109	1	1	6.58	122	54.56	1	425	2.153	1.3	46	40	2.329	1	2	1	2	1	45.58	4.78	3
276	0	26	0	160	53	20.7	147	92	55	61.08	95	1	0	4.23	101	69.54	0	473	2.195	1.48	55.76	34.9	2.0714	1	1	1	2	2	20.24	2.13	2
277	0	28	0	157	42	17.04	141	91	50	48.38	109	1	1	6.58	122	54.56	1	425	2.153	1.3	46	40	2.329	1	2	1	2	1	45.58	4.78	3
278	0	26	0	160	53	20.7	147	92	55	61.08	95	1	0	4.23	101	69.54	0	473	2.195	1.48	55.76	34.9	2.0714	1	1	1	2	2	20.24	2.13	2
279	0	28	0	157	42	17.04	141	91	50	48.38	109	1	1	6.58	122	54.56	1	425	2.153	1.3	46	40	2.329	1	2	1	2	1	45.58	4.78	3
280	0	26	0	160	53	20.7	147	92	55	61.08	95	1	0	4.23	101	69.54	0	473	2.195	1.48	55.76	34.9	2.0714	1	1	1	2	2	20.24	2.13	2
281	0	28	0	157	42	17.04	141	91	50	48.38	109	1	1	6.58	122	54.56	1	425	2.153	1.3	46	40	2.329	1	2	1	2	1	45.58	4.78	3
282	0	26	0	160	53	20.7	147	92	55	61.08	95	1	0	4.23	101	69.54	0	473	2.195	1.48	55.76	34.9	2.0714	1	1	1	2	2	20.24	2.13	2
